# Supplementary material
Source: PubMed Central journal article supplement (PMC4390092)
Supplement: NIHMS669655-supplement-Supplementary_Materials_Merged.pdf [file NIHMS669655-supplement-Supplementary_Materials_Merged.pdf]

# Supplementary Materials

## S.1 Features Analysis Configuration (Pg. 3-9)

- 1 Preparation of Native Data
- 2 Generation of Relaxed Natives
- 3 Features Extraction
- 4 Features Analysis Plots

## S.2 Features Analysis Compendium

<http://rosettadesign.med.unc.edu/momeara/features-compendium>

## S.3 HBv2 H-Bond Model Development (Pg. 10-34)

- 1 The one-dimensional  $BA_\chi$  distributions for  $sp^2$ -hybridized acceptors by donor type
- 2 The Lambert-azimuthal projection
- 3 Lambert-azimuthal projections of Serine/Threonine hydrogen bonds to Aspartate/Glutamate.
- 4 Lambert-azimuthal projections of lysine/backbone hydrogen bonds
- 5 Lambert-azimuthal height maps of the  $h_{HBv2}^b$ ,  $h_{HBv2}^c$ , and  $h_{HBv2}^d$  potentials
- 6 Lambert-azimuthal projections of long-range backbone-backbone hydrogen bonds
- 7 The joint  $AHD/BAH$  distribution of bidentate ASP/GLU vs ARG hydrogen bonds
- 8 The  $BAH$  distribution of backbone/backbone hydrogen bonds by sequence separation
- 9 Score comparison for backbone/backbone hydrogen bonds between  $HBv1$  and  $HBv2$
- 10  $BAH$  distributions for  $sp^3$  hybridized acceptors
- 11  $HAH$  distributions for  $sp^3$  hybridized acceptors
- 12 Hydroxyl- $\chi$  angles by acceptor type
- 13 Acceptor-hydrogen distance for designed serines and threonines in alpha helices
- 14  $BAH/BA_\chi$  Lambert-azimuthal projection for designed serines and threonines in alpha helices
- 15  $AHD$  angle for designed serines and threonines in alpha helices
- 16  $ElecHBv2$  energies for designed serines and threonines in alpha helices
- 17 Problematic fitting of new polynomials for the  $AHD$  angle
- 18 Fitting  $AHD$  polynomials instead of  $\cos(AHD)$  polynomials alleviates the problem
- 19  $AHD$  distributions produced by  $HBv2$  broken down by donor and acceptor type
- 20 Derivative discontinuities in  $HBv1$  produce significant artifacts
- 21 Apparent distance dependence of the  $AHD$  angle distribution
- 22 Distance dependence of the angular terms in the  $HBv1$  model
- 23 Backbone/backbone acceptor-hydrogen distance ( $AH_{dis}$ ) distributions by sequence separation
- 24 Acceptor-hydrogen distance ( $AH_{dis}$ ) distributions broken down by donor and acceptor type
- 25 Acceptor to donor-heavyatom distance ( $AD_{dis}$ ) distributions broken down by donor and acceptor type

#### S.4 Model Details (Pg. 35-46)

##### 1 HBv2

1. Chemical Types
2. Alternate models considered
3.  $sp^2$  functional form

##### 2 Elec

##### 3 Disulfide

1. Disulfide geometric feature distributions
2. Disulfide energy potential

#### S.5 Sample Sources and Energy Functions (Pg. 47-52)

##### 1 Overview of Energy Functions

##### 2 Flags and Weights for Energy Function

##### 3 Top8000 structures

#### S.6 Benchmark Details (Pg. 53-57)

##### 1 FastRelax native timing benchmark

##### 2 Structure prediction benchmark details

## S.1 Features Analysis Configuration

This section describes details of how the features analysis was conducted.

### General workflow

- 1) Preparation of Native Data
- 2) Generation of Relax Structures for each energy function
- 3) Generation of Features with Talaris2013 H-Bonds for each energy function
- 4) Create Features Analysis plots

### S.1.1) Preparation of Native Data

a) Begin with the Top8000 set (<http://kinemage.biochem.duke.edu/databases/top8000.php>), curated by the Richardson Lab from structures deposited into the Protein Databank (Berman et al., 2000) filtered at the %70 percent homology level and filtered for having electron density structures deposited into the electron density server (<http://eds.bmc.uu.se/eds/>), this yielded ~6k protein chains, ~1.6M residues, and ~1.3M H-bonds. Since crystal structures usually lack hydrogen atoms, we used the program Reduce (Word, et al. 1999) to add them. Critically, Reduce makes minimal assumptions about where to place hydrogen atoms, defining most of their coordinates from ideal bond angles and lengths alone. For ambiguously located hydrogen atoms, e.g., the hydroxyl *HG* atom in serine, it samples a set of rotations for the hydroxyl hydrogen based on the location of nearby acceptor groups (as opposed to sampling a predetermined set of dihedral angles such as at 60°, -60°, and 180°) and scores hydrogen bond contacts using a metric based on sphere overlap for both favorable interactions between donor and acceptor atoms and unfavorable interactions between colliding atoms (as opposed to making assumptions based on charges or preferred hydrogen-bonding angles or dihedrals).

b) Convert names of hydrogens to Rosetta's naming convention:

```
python rosetta/main/tools/convert_hatm_names.py \  
  --data_dir top8000_chains_eds_70 \  
  --output_dir top8000_chains_eds_70_rosetta_named_hydrogens
```

c) The top8000 set is specifies a single chain from each PDB, these were extracted and put into separate pdb files prior to use.

### S.1.2) Generate Relax structures for each energy function

For each Score function, we applied the FastRelax protocol to each structure to sample near native conformations. The protocol iterates between repacking sidechains and performing quasi-Newton minimization of torsional degrees of freedom while ramping in five steps the strength of the repulsive component of the Lennard-Jones term from 1/10<sup>th</sup> up to full strength, cycling from low- to high-strength repulsion three times. We chose this sampling protocol over less aggressive protocols (such as only performing minimization) to allow the structures to escape local minima in the energy landscape, and over more aggressive protocols (such as trying to fold proteins from extended chains using Rosetta's AbRelax protocol (Bradley, Misura, & Baker, 2005)) in the interest of focusing our efforts on matching distributions where native-like contacts are possible: an *ab initio* folding protocol might emphasize easy-to-form local contacts over harder-to-form long-range contacts and misrepresent the deficiencies in an energy function.

a) Prepare the following input files:

- i) bsub command
- ii) condor submission script
- iii) top8000 pdbs and .list file (listing the relative paths to the pdb files)
- iv) flags file
- v) features.xml RosettaScript

In what follows, <sample\_source\_id> has the following form:

```
<data>_<protocol>_<sample_source>_r<revision>_<date>
```

where revision is the git revision identifier of the repository and the date format is YYMMDD so it can be sorted alphabetically. For example:

```
top8000_relax_ElecHBv2_rD28828_130301
```

i) For this study we used the KillDevil LSF cluster at UNC Chapel Hill (<http://its.unc.edu/research/its-research-computing/computing-resources/killdevil/>).

**bsub command:**

```
bsub \
-q day \
-n 256 \
-J features_<sample_source_id> \
-o features_<sample_source_id>_%J.log \
-e features_<sample_source_id>_%J.err \
-a mvapich mpirun \
<path>/Rosetta/main/source/bin/rosetta_scripts.mpi.linuxgccrelease \
-database <path>/Rosetta/main/database \
-out:mpi_tracer_to_file features_<sample_source_id>.log \
@flags
```

**ii) condor submission script:**

```
universe = vanilla
Notify_user =
notification = Error
Log = features_<sample_source_id>.condor.log
Executable = rosetta_scripts.mpi.linuxgccrelease
Requirements = ( Memory > 512)
GetEnv = True
Error = fetures_.condor.error.log
Output = features_<sample_source_id>.condor.output.log
arguments = -database <path>/rosetta/Rosetta/main/database @flags
priority = -10
queue 256
```

iii) The following options were used (broken into sections for readability)

**General flags:**

```
-options:user
-remember_unrecognized_res
-remember_unrecognized_water
-no_optH
-jd2:delete_old_poses
-mute protocols.jd2
-mute core.io.pdb.file_data
```

```
-mute core.scoring.etable  
-mute core.io.database  
-mute core.scoring.ScoreFunctionFactory  
-mute core.pack.task  
-mute protocols.ProteinInterfaceDesign.DockDesign
```

**Input flags:**

```
-in:path top8000_chains_eds_70_rosetta_named_hydrogens  
-in:file:1 top8000_chains_eds_70_rosetta_named_hydrogens/all_pdb.list
```

**Output flags:**

```
-out:nooutput
```

**Protocol flags:**

```
-parser:protocol features.xml
```

iv) The following xml script is used to apply the fast relax protocol to each input structure and extract features into the features database.

Each energy function will have different subtags for the score function *s* described below.

The `init_struct` mover is used to store a reference to the original structure for the RMSD to native features reporter.

#### Features.xml:

```
<ROSETTASCRIPTS>
  <SCOREFXNS>
    <s weights=scorel2prime>
      <Reweight scoretype=scoretype weight=weight/>
      ...
    </s>
  </SCOREFXNS>
  <MOVERS>
    <SavePoseMover name=init_struct reference_name=init_struct/>
    <FastRelax name=fast_relax scorefxn=s/>
    <ReportToDB
      name=features_reporter
      database_name="features.db3"
      database_mode=sqlite3
      database_separate_db_per_mpi_process=1
      batch_description="<data> <protocol> <sample_source>"

      <feature name=ScoreTypeFeatures/>
      <feature name=StructureScoresFeatures scorefxn=s/>
      <feature name=PoseCommentsFeatures/>
      <feature name=PoseConformationFeatures/>
      <feature name=ProteinRMSDFeatures reference_name=init_struct/>
      <feature name=RadiusOfGyrationFeatures/>
      <feature name=ResidueTypesFeatures/>
      <feature name=ResidueFeatures/>
      <feature name=PdbDataFeatures/>
      <feature name=UnrecognizedAtomFeatures/>
      <feature name=PairFeatures/>
      <feature name=ResidueBurialFeatures/>
      <feature name=ResidueSecondaryStructureFeatures/>
      <feature name=ProteinBackboneAtomAtomPairFeatures/>
      <feature name=ProteinBackboneTorsionAngleFeatures/>
      <feature name=ProteinResidueConformationFeatures/>
      <feature name=HBondFeatures scorefxn=s/>
      <feature name=HBondParameterFeatures scorefxn=s/>
      <feature name=SaltBridgeFeatures/>
      <feature name=ChargeChargeFeatures/>
    </ReportToDB>
  </MOVERS>
  <PROTOCOLS>
    <Add mover_name=init_struct/>
    <Add mover_name=fast_relax/>
    <Add mover_name=features_reporter/>
  </PROTOCOLS>
</ROSETTASCRIPTS>
```

v) At the completion of the run, there will be 265 SQLite3 database files named `features.db3_###`, each containing the features extracted from the structures run a specific node in the cluster. These were then merged together using

```
<path>/Rosetta/main/tests/features/sample_sources/merge.sh \
  features.db3 \
  features.db3_*
```

### S.1.3) Generation of Features for each energy function

To make the comparison between H-bond features is important to have a consistent definition of what constitutes an H-bond. We used the ElecHBv2 definition for features and statistics described in this this paper. So to generate features using the ElecHBv2 Energy function we ran the following features extraction protocol using the features database generated in step 2 as input:

On the command line

```
# in directory containing features.db3 extracted after relaxing natives
mkdir ElecHBv2; cd ElecHBv2
<path>/Rosetta/main/source/bin/rosetta_scripts.<platform> \
  -database <path>/Rosetta/main/database @flags && log
```

with the following support files

flags:

```
-options:user
-remember_unrecognized_res
-remember_unrecognized_water
-no_optH
-jd2:delete_old_poses
-inout:dbms:database_name ../features.db3
-in:use_database
-out:nooutput
-parser:protocol features.xml
```

features.xml: Note no specific score function weighting for flags are necessary because the ElecHBv2 is consistent with the Talaris2013 energy function (default May 2013) with the caveat that the HBond energy weight in ElecHBv2 is 80% the weight in Talaris2013, but this does this has no impact on the definition H-bonds.

```
<ROSETTASCRIPITS>
  <MOVERS>
    <ReportToDB
      name=features_reporter
      database_name="features.db3"
      database_mode=sqlite3
      database_separate_db_per_mpi_process=1
      batch_description = "Features with Talaris2013">
      <feature name=ScoreTypeFeatures/>
      <feature name=StructureScoresFeatures scorefxn=s/>
      <feature name=PoseCommentsFeatures/>
      <feature name=PoseConformationFeatures/>
      <feature name=RadiusOfGyrationFeatures/>
      <feature name=ResidueTypesFeatures/>
      <feature name=ResidueFeatures/>
      <feature name=PdbDataFeatures/>
      <feature name=UnrecognizedAtomFeatures/>
      <feature name=PairFeatures/>
      <feature name=ResidueBurialFeatures/>
      <feature name=ResidueSecondaryStructureFeatures/>
      <feature name=ProteinBackboneAtomAtomPairFeatures/>
```

```

        <feature name=ProteinBackboneTorsionAngleFeatures/>
        <feature name=ProteinResidueConformationFeatures/>
        <feature name=HBondFeatures/>
        <feature name=HBondParameterFeatures/>
        <feature name=SaltBridgeFeatures/>
        <feature name=ChargeChargeFeatures/>
    </ReportToDB>
</MOVERS>
<PROTOCOLS>
    <Add mover_name=features_reporter/>
</PROTOCOLS>
</ROSETTASCRIPTS>

```

## S.1.4) Create Features Analysis plots

To generate features analysis plots, we call

```

<path>Rosetta/main/tests/features/compare_sample_sources.R \
    --config analysis_configuration.json

```

with the following configuration file:

```

analysis_configuration.json:
{
  "output_dir" : "build/general_analysis",
  "preparation_sample_source_comparisons" : [
  ],
  "sample_source_comparisons" : [
    {
      "sample_sources" : [
        {
          "database_path" : "Native/ElecHBv2/features.db3",
          "id" : "Native",
          "reference" : true
        },
        {
          "database_path" : "Elec/ElecHBv2/features.db3",
          "id" : "Elec",
          "reference" : false
        },
        {
          "database_path" : "HBv1/ElecHBv2/features.db3",
          "id" : "HBv1",
          "reference" : false
        },
        {
          "database_path" : "HBv2/ElecHBv2/features.db3",
          "id" : "HBv2",
          "reference" : false
        },
        {
          "database_path" : "ElecHBv2/features.db3",
          "id" : "ElecHBv2",
          "reference" : false
        }
      ]
    },
    {
      "analysis_scripts" : [

```



```
"scripts/analysis/plots/hbonds/geo_dim_2d_conditional/sp2_BAH_chi_polar_density_beta_sheet_alpha_helix.R",
  ...
],
"output_formats" : [
  "output_print_pdf",
  "output_small_pdf",
  "output_slide_pdf",
  "output_html",
  "output_csv"
]
}
]
```

## S.3 Supplemental Section: HBv2 HBond Model

Figure S.3.1: The one-dimensional  $BA_\chi$  distributions for  $sp^2$ -hybridized acceptors by donor type. Red: The native distribution; Green: HBv1; Blue: HBv2. Three-letter donor- and acceptor-type names are given in Figure S.4.1. Plots in this section include hydrogen bonds with sequence separation between donor and acceptor greater than 4 (unless otherwise noted). The  $BA_\chi$  dihedral distributions for  $sp^2$  hybridized acceptors in crystal structures broadly show a sinusoidal pattern consistent with the idea that donor H-atoms would seek out the  $sp^2$  plane. The sinusoidal pattern is prominent in the hydroxyl-carboxyl (HXL-CXL) and hydroxyl-carboxamide (HXL-CXA) distributions, which resemble a  $\cos(2BA_\chi)$  function with peaks of equal height at  $0^\circ$  and  $180^\circ$  (dihedrals where the H-atom is in the  $sp^2$  plane) and troughs of equal depth at  $90^\circ$  and  $270^\circ$  (dihedrals where the H-atom is perpendicular to the  $sp^2$  plane), though the amplitude is greater for the carboxylate H-bonds. The distribution for carboxyl-guanidino (D/E to R) H-bonds, on the other hand, shows a large peak at  $180^\circ$ , and almost no density at  $0^\circ$ . The backbone/backbone distribution (which are dominated by  $\beta$ -sheet contacts after H-bonds with sequence separation less than five are filtered out), on the other hand, does not at all resemble a sinusoidal function.

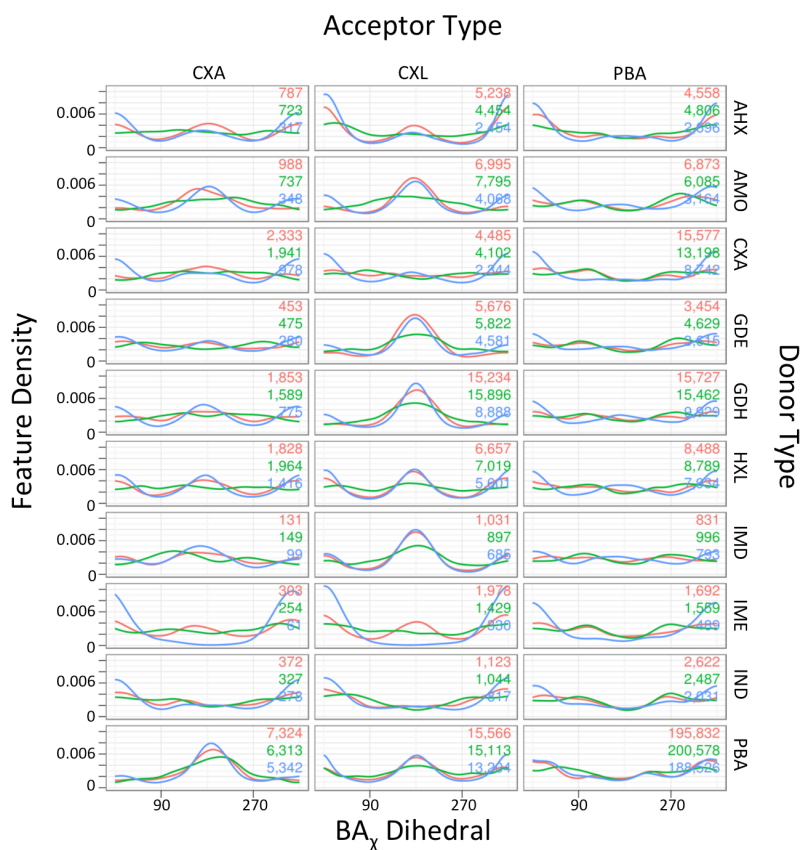

Figure S.3.2: *The Lambert-azimuthal projection.* This projection maps the surface of a sphere, parameterized by  $(\phi, \theta)$  for example  $(BAH, BA_\chi)$ , onto the plane, parameterized by  $(x, y)$ , via

$$x = 2 \sin\left(\frac{\phi}{2}\right) \cos(\theta)$$

$$y = 2 \sin\left(\frac{\phi}{2}\right) \sin(\theta)$$

For a hydrogen atom approaching a carboxyl oxygen (Left), consider the unit sphere centered on the oxygen with a positive  $z$ -axis pointed away from the base atom (C), and where the acceptor-base-base atom (R) lies in the  $x$ - $z$  plane. The positive  $y$ -axis is going into the page. The red dot denotes the location on the surface of the sphere directly between the hydrogen and the oxygen. If this sphere were the surface of the earth (Right), then the Lambert-azimuthal projection places the North Pole in the center, and the green latitude lines appear as concentric circles. Longitude lines (not shown) would radiate outwards from the center as straight lines. If you consider the origin to lie at the North Pole ( $\phi = 0^\circ$ ), then the prime meridian (Longitude =  $\theta = 0^\circ$ ) lies along the positive  $x$ -axis. The positive  $x$ -axis corresponds to a  $BA_\chi$  dihedral of  $0^\circ$ , the positive  $y$ -axis corresponds to a  $BA_\chi$  dihedral of  $90^\circ$ , the negative  $x$ -axis corresponds to a  $BA_\chi$  dihedral of  $180^\circ$ , and the negative  $y$ -axis corresponds to a  $BA_\chi$  dihedral of  $270^\circ$ . The Lambert-azimuthal projection preserves the area of objects on the surface of the sphere, but it still distorts them; notice that Australia appears wider than North America. Notice also that Australia and the entire southern hemisphere are *visible* in this projection.

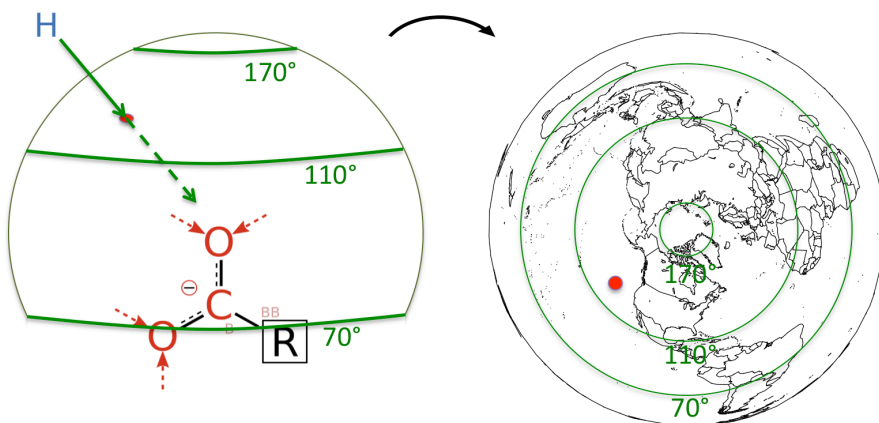

Figure S.3.3: *Lambert-azimuthal projections of Serine/Threonine hydrogen bonds to Aspartate/Glutamate*. A. Natives, B. *HBv1*, C. *HBv2*, D. *ElecHBv2*. The feature-density color mappings are individually normalized. The  $BA_\chi$  dihedral angles are marked with diagonal lines; the  $BAH$  angles are shown as concentric circles radiating outwards from a  $BAH$  angle of  $180^\circ$  at the center of the plots. The  $sp^2$  lobes would be located at a  $BAH$  angle of  $120^\circ$ , and at  $BA_\chi$  dihedrals of  $0^\circ$  and  $180^\circ$ . Indeed, in the natives, these  $BAH/BA_\chi$  combinations represent the peaks of the distributions. The *HBv1* model correctly recapitulates a peak at  $BAH = 120^\circ$ , but loses almost all of the  $BA_\chi$  preference. The mild preference for  $BA_\chi$  of  $180^\circ$  over  $90^\circ$  is likely an artifact of having started from native hydrogen bond contacts. *HBv2* and *ElecHBv2* both recover the native distribution quite well.

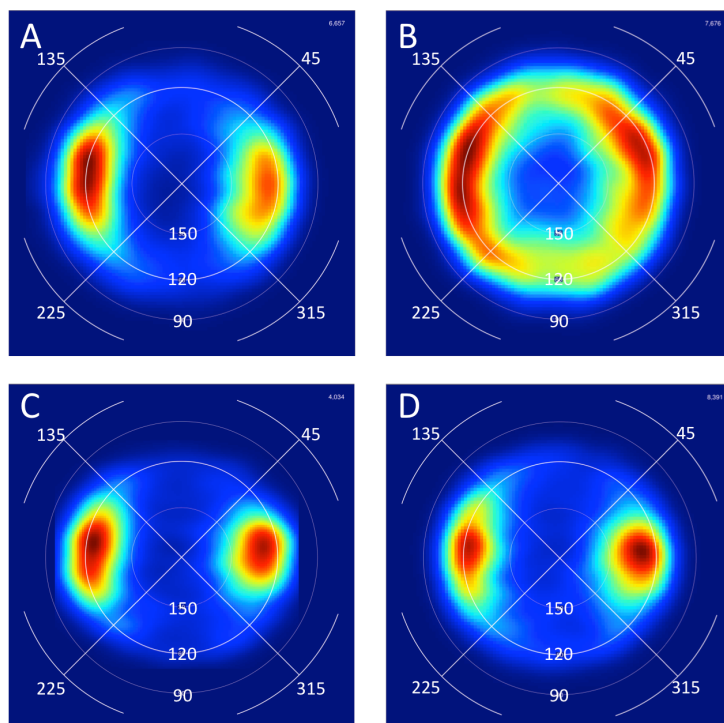

Figure S.3.4: *Lambert-azimuthal projections of lysine/backbone hydrogen bonds. A. Natives, B. HBv1, C. HBv2, D. ElecHBv2.* The feature-density color mappings are individually normalized. Unlike most hydrogen bonds involving  $sp^2$ -hybridized acceptors, lysine/backbone hydrogen bonds occur with significant frequency at  $BA_\chi$  of  $90^\circ$ . They are also much more tightly distributed towards a  $BAH$  angle of  $180^\circ$ . The *HBv2* and *ElecHBv2* energy functions both produce distributions that strongly resemble the carboxyl-hydroxyl hydrogen bonds shown in Supp. Fig. S.3.3, with two well separated lobes, even if the  $BAH$  angles at the distribution peaks are  $135^\circ$  rather than  $120^\circ$ .

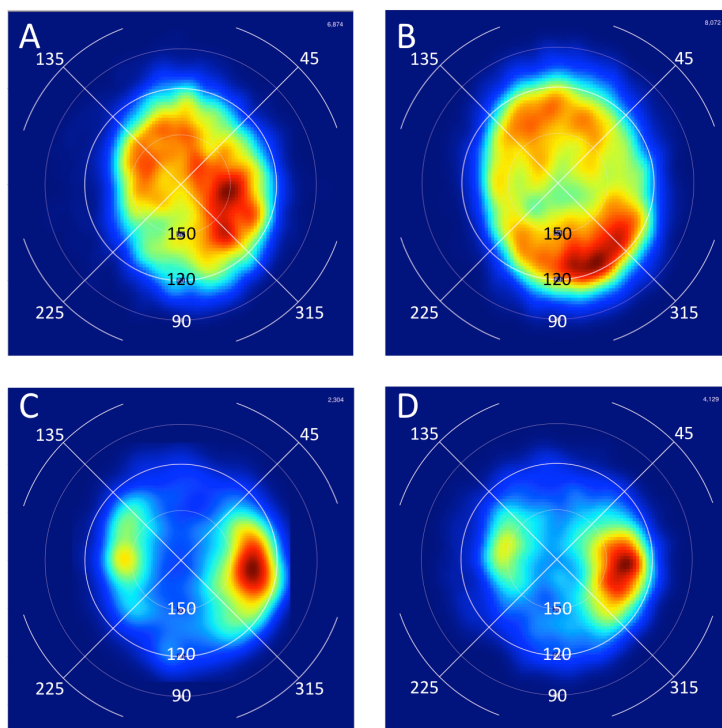

Figure S.3.5: Lambert-azimuthal height maps of the  $h_{BAH,BA_\chi}^b$ ,  $h_{BAH,BA_\chi}^c$  and  $h_{BAH,BA_\chi}^d$  potentials.  $h_{BAH,BA_\chi}^b$  is shown in A and D;  $h_{BAH,BA_\chi}^c$  is shown in B and E,  $h_{BAH,BA_\chi}^d$  is shown in C and F. The functional forms for these three models are described in section S.4.2. The cross sections shown in D, E, and F cut through the potentials along the  $BA_\chi = 90^\circ, 270^\circ$  axis (the  $y$ -axis). The peaks in these potentials, which are favorable in these formulations, are placed at  $BAH = 120^\circ$  and  $BA_\chi = 0^\circ$  and  $180^\circ$ . The potentials differ in their treatment of the  $BA_\chi = 90^\circ, 270^\circ$  axis:  $h_{BAH,BA_\chi}^b$  is perfectly flat across this axis,  $h_{BAH,BA_\chi}^c$  places a depression at  $BAH = 180^\circ$  relative to  $BAH = 120^\circ$  and  $BA_\chi = 90^\circ$  and  $270^\circ$ , and  $E_{HBV2}^d$  places saddle point at  $BAH = 180^\circ$  with the potential decreasing as it approaches  $BAH = 120^\circ$  and  $BA_\chi = 90^\circ$  and  $270^\circ$ .

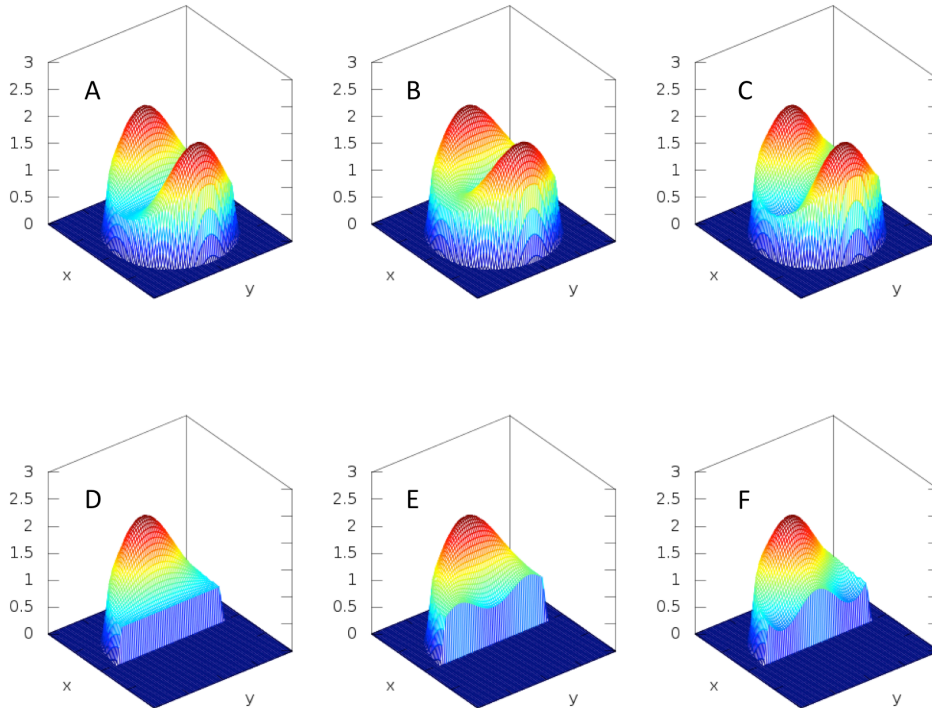

Figure S.3.6: *Lambert-azimuthal projections of long-range backbone-backbone hydrogen bonds.* A. Natives, B.  $E_{\text{HBv2}}^b$ , C.  $E_{\text{HBv2}}^c$ , and D.  $E_{\text{HBv2}}^d$ . The shape of these three potentials is plotted in Fig. S.3.5 and the functional form given in section S.4.2. The appearance of density in C and D in regions where its absent in the native distributions strongly suggested that the correct  $BA_H/BA_\chi$  potential would need to be flat through the  $BA_\chi = 90^\circ, 270^\circ$  axis.

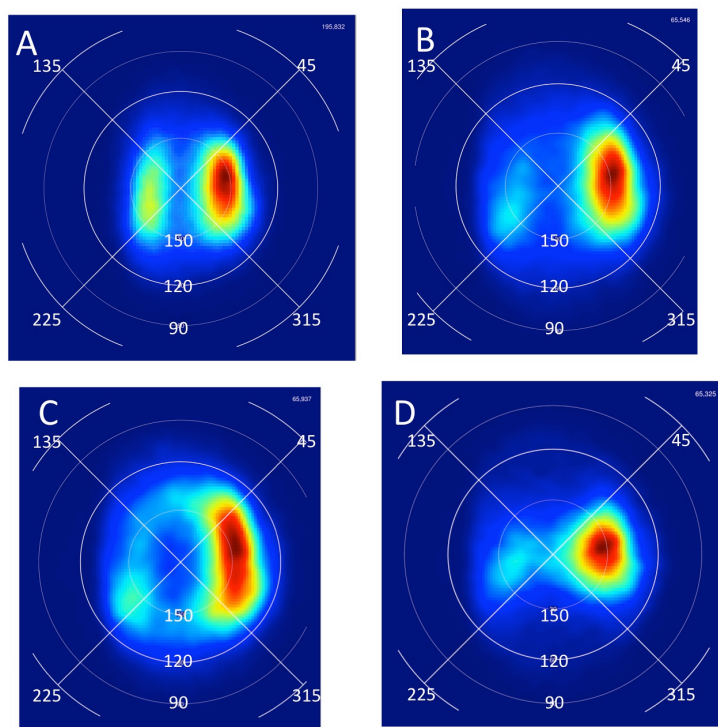

Figure S.3.7: *The joint AHD/BAH distribution of bidentate ASP/GLU vs ARG hydrogen bonds.* The native joint density distribution (A) for single hydrogen bonds (red) and bidentate hydrogen bonds (cyan) is shown as a contour map. There is a single peak for bidentate hydrogen bonds at  $\cos(AHD) \sim 0.83$ ,  $\cos(BAH) = 0.77$ , but the distribution is quite broad. The peak for single hydrogen bonds at  $\cos(AHD) = 1$ ,  $\cos(BAH) = 0.5$  represents  $AHD = 180^\circ$  and  $BAH = 120^\circ$ . In contrast,  $E_{HBv2}^b$  (B) produced two peaks for bidentate hydrogen bonds; a small one very close to the peak observed for natives, and another much sharper one at  $\cos(AHD) = 0.95$  and  $\cos(BAH) = 0.35$ . This suggested to us that the potential was emphasizing one of the two hydrogen bonds while sacrificing the other. The multiplicative structure of the  $E_{HBv2}^b$  potential certainly makes it possible for one high-quality hydrogen bond + one low-quality hydrogen bond to sum to a lower total energy than two medium-quality hydrogen bonds. A purely additive potential would not produce this kind of behavior, so following the observation of this distribution, we pursued a purely additive potential. *ElecHBv2* (C), was tested after updating to the new ideal bond geometries suggested by Song et al.; the bidentate distributions it produces much more closely matched that of the native's. Indeed, updating the ideal bond geometries corrected the bidentate distributions for the  $E_{HBv2}^b$  potential (D). We therefore have little evidence suggesting that the multiplicative functional form of  $E_{HBv2}^b$  is worse than the additive functional form of  $E_{HBv2}$ .

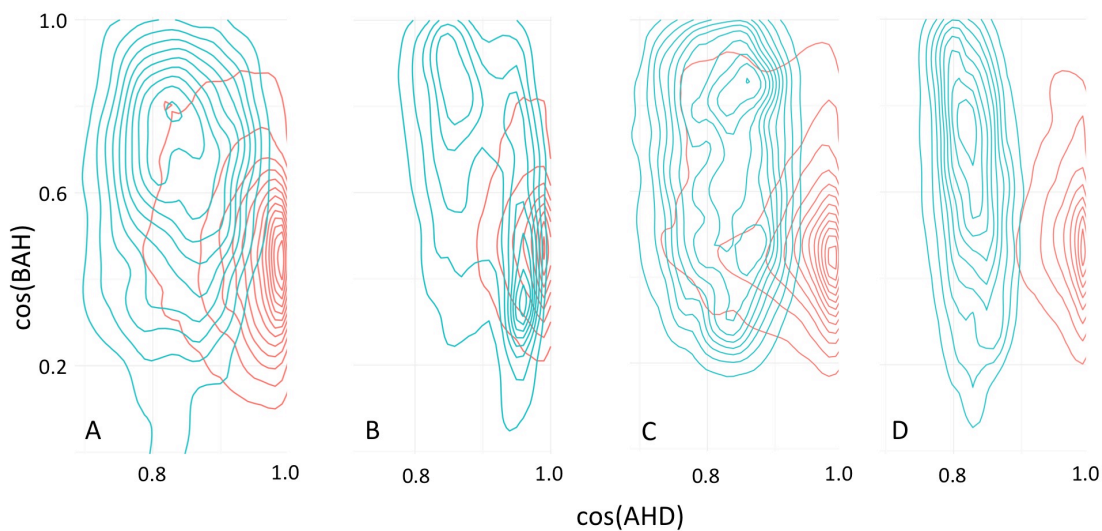



Figure S.3.8: *The BAH distribution of backbone/backbone hydrogen bonds by sequence separation.* Red: The native distribution; Green: *HBv1*; Blue: *HBv2*. The sequence separation is given in the upper left corner denoting the difference in the sequence position of the donor and the acceptor (e.g. helical hbonds have a sequence separation of +4). The same potential is used to describe the optimal *BAH* angle ( $120^\circ$ ) in *HBv2*, whereas three separate sets of polynomials are used to describe the *BAH* dependence in *HBv1*.

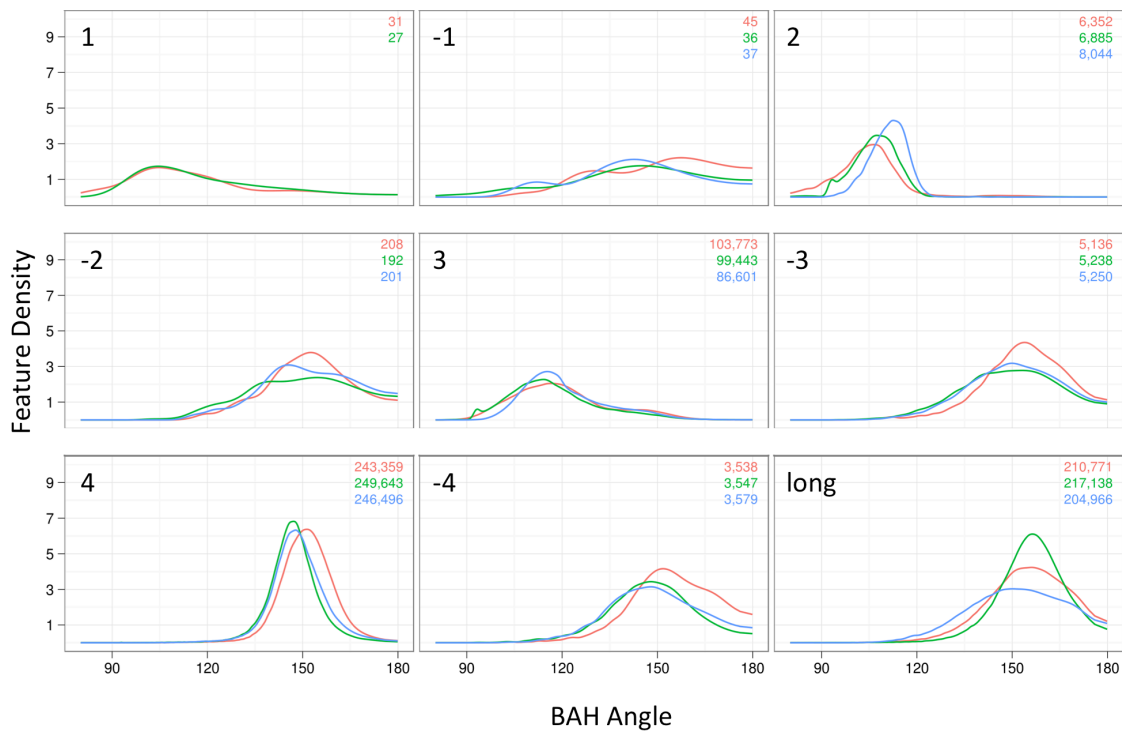

Figure S.3.9: *Score comparison for backbone/backbone hydrogen bonds between HBv1 and HBv2.* These scatter plots were generated by scoring crystal structures with both *HBv1* and *HBv2*. Each point represents a single hydrogen bond where its *x*-coordinate represents its weighted score from *HBv1*, and its *y* coordinate represents its weighted score from *HBv2*. The sequence separation is given in the upper left corner denoting the difference in the sequence position of the donor and the acceptor (e.g. helical hbonds have a sequence separation of +4). The line,  $x = y$  is shown. Short-range hydrogen bonds are down-weighted by  $\frac{1}{2}$  relative to long-range hydrogen in *HBv1*, but they are not similarly down-weighted in *HBv2*. Strikingly, long-range hydrogen bonds are quite a bit weaker in *HBv2*.

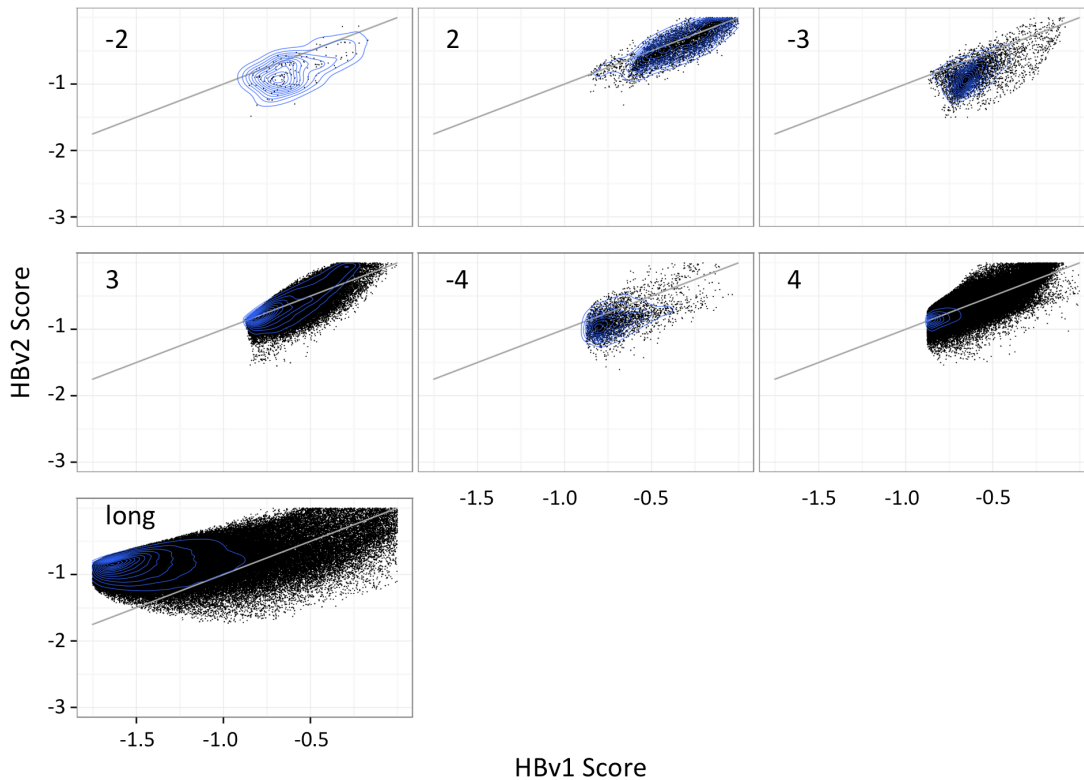

Figure S.3.10: *BAH* distributions for  $sp^3$  hybridized acceptors. Red: Natives. Green: *HBv1*. Blue: *HBv2*. Aromatic hydroxyl (AHX, i.e. tyrosine) and Hydroxyl (HXL, i.e. serine and threonine) hydrogen bond acceptors both prefer to accept with *BAH* angles larger than the  $109.5^\circ$  angle predicted based on the location of the  $sp^3$  lobes.

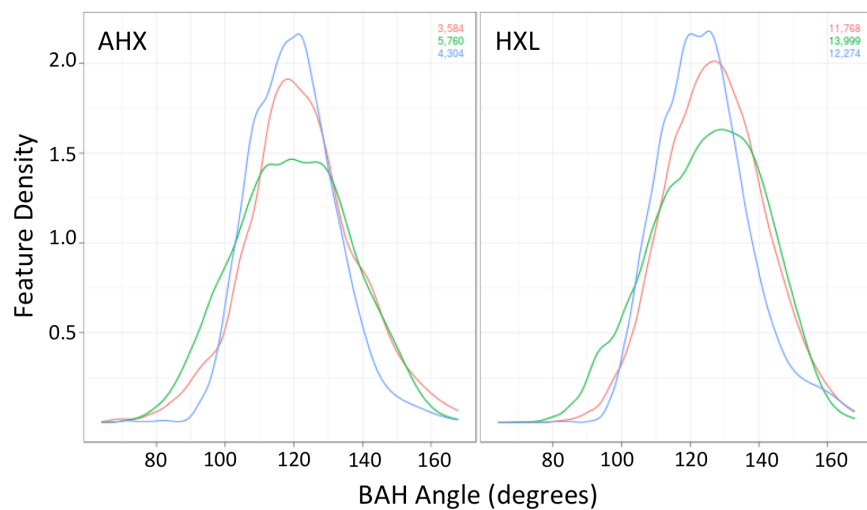

Figure S.3.11: *HAH* distributions for  $sp^3$  hybridized acceptors. Red: Natives. Green: *HBv1*. Blue: *HBv2*. The *HAH* angle is measured from the  $sp^3$  acceptor hydrogen, the acceptor heavyatom, and the donor hydrogen. Since the acceptor hydrogen's position has to be inferred, we consider here only the acceptors that are both accepting and donating hydrogen bonds to increase our confidence in the acceptor hydrogen's position. *HBv1* actually uses the *HAH* angle to evaluate the h polynomial—it treats the acceptor hydrogen as the “B” atom in defining the *BAH* angle. It is a little surprising, then, that the *HBv1* distribution for the *HAH* angle fits the native distribution so poorly. *HBv2*, on the other hand, does not explicitly model the *HAH* angle. Its *HAH* distribution, however, is influenced by both the explicitly modeled *BAH* angle and a sinusoidal penalty on the dihedral angle defined by the acceptor hydrogen, the acceptor-base, the acceptor and the donor hydrogen.

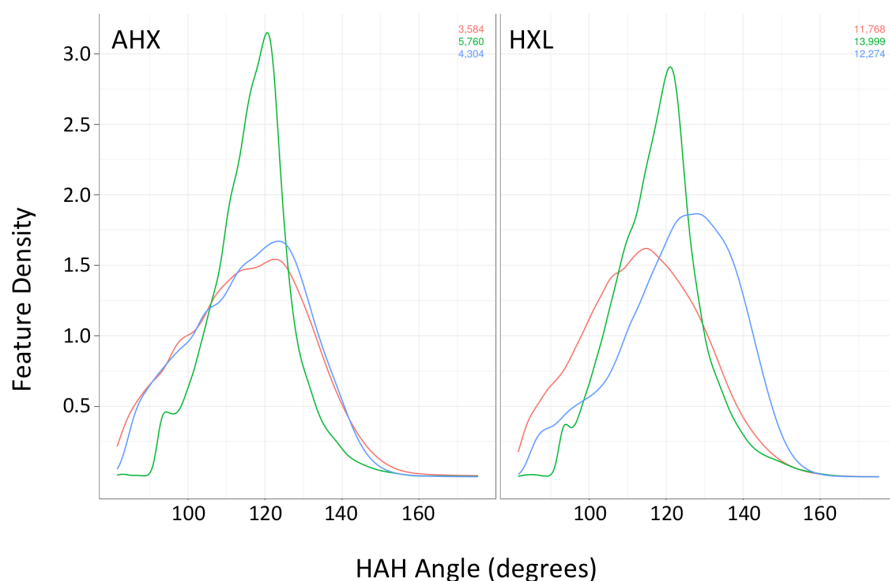

Figure S.3.12: *Hydroxyl chi angles by acceptor type*. Red: Natives. Green: Abinitio models generated w/ *HBv1*. Blue: Abinitio models generated w/ *HBv2*. Acceptor-type names are given in Figure 1. The  $\chi_2$  distribution in crystal structures does not show a preference for the staggered dihedral angles of  $60^\circ$ ,  $-60^\circ$ , and  $180^\circ$  as might be expected. Instead, it shows peaks near  $90^\circ$  and  $-90^\circ$  and a broad plateau of density between in the range between them. A clear trough can be seen at  $0^\circ$ . *HBv1* sampled  $\chi_2$  at the staggered dihedral angles only. Though it seems that in many cases the  $-60^\circ$  and  $+60^\circ$  samples minimized to the native peaks, *HBv1* did produce a non-native peak at  $180^\circ$ . *HBv2* samples at  $20^\circ$  increments starting at  $0^\circ$ , and produces a distribution that is a bit more native like.

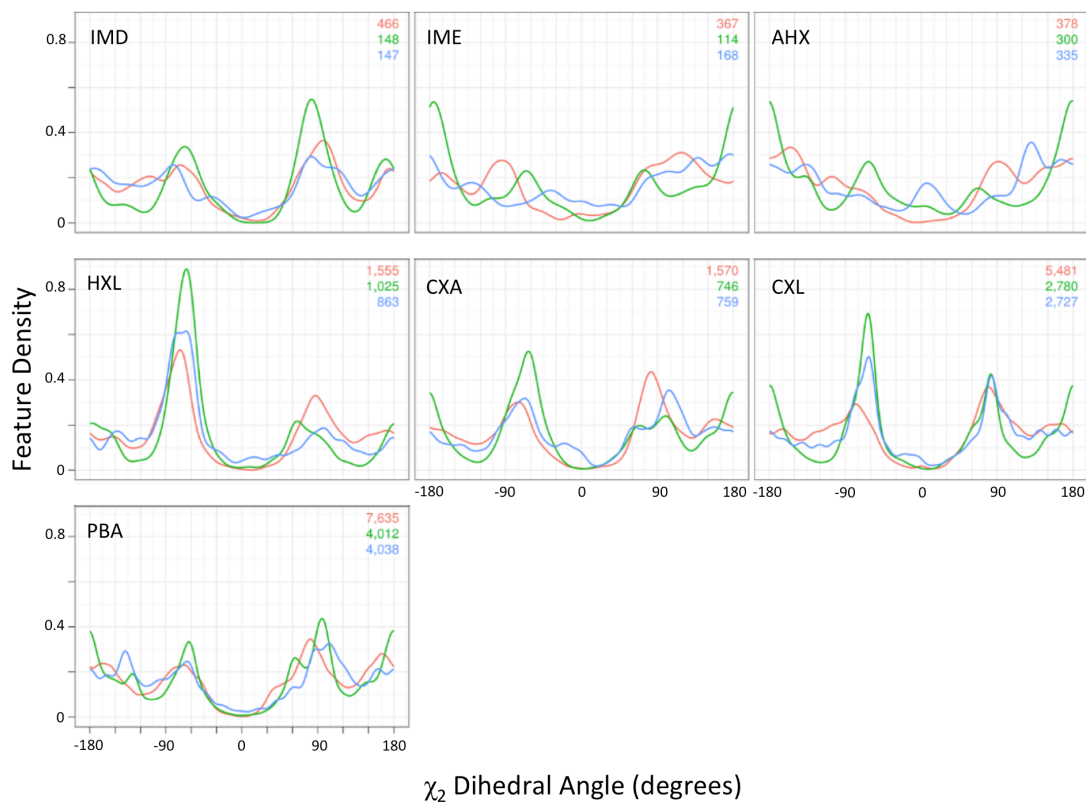

Figure S.3.13: *Acceptor-hydrogen distance for designed serines and threonines in  $\alpha$ -helices.* When the backbone/sidechain exclusion rule is removed, Rosetta is able to design in very good hydrogen bonds between serines at residue  $i$ , and backbone oxygens at residues  $i-3$  and  $i-4$ . The peak in the hydrogen-acceptor distance distribution in native structures for hydroxyl/backbone hydrogen bonds is at 1.7 Å. This small dataset was created by redesigning 38 large proteins. Counts of each kind of hydrogen bond formed are given in the upper-right corner of each plot.

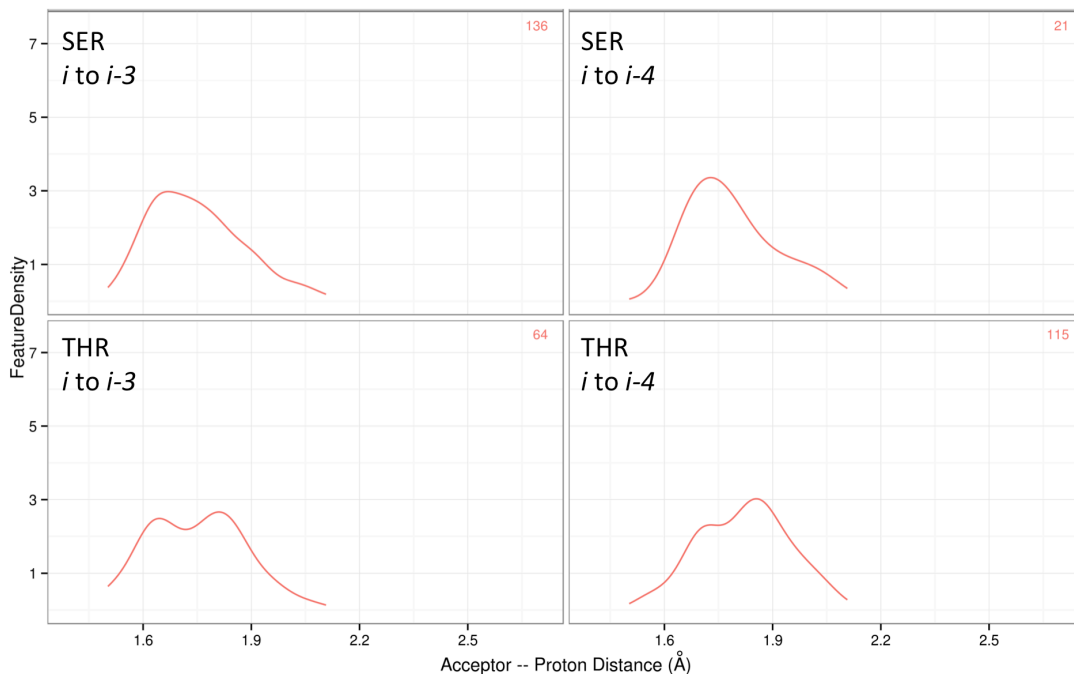

Figure S.3.14:  $BA_H / BA_\chi$  Lamber-azimuthal projection for designed serines and threonines in  $\alpha$ -helices. When the backbone/sidechain exclusion rule is removed, Rosetta is able to design in very good hydrogen bonds between serines at residue  $i$ , and backbone oxygens at residues  $i - 3$  and  $i - 4$ . Contacts to residue  $i - 3$  have a more favorable  $BA_\chi$  dihedral than those formed to residue  $i - 4$ ; however, the second class of contacts still produces quite favorable energies. This small dataset was created by redesigning 38 large proteins. Counts of each kind of hydrogen bond formed are given in the upper-right corner of each plot

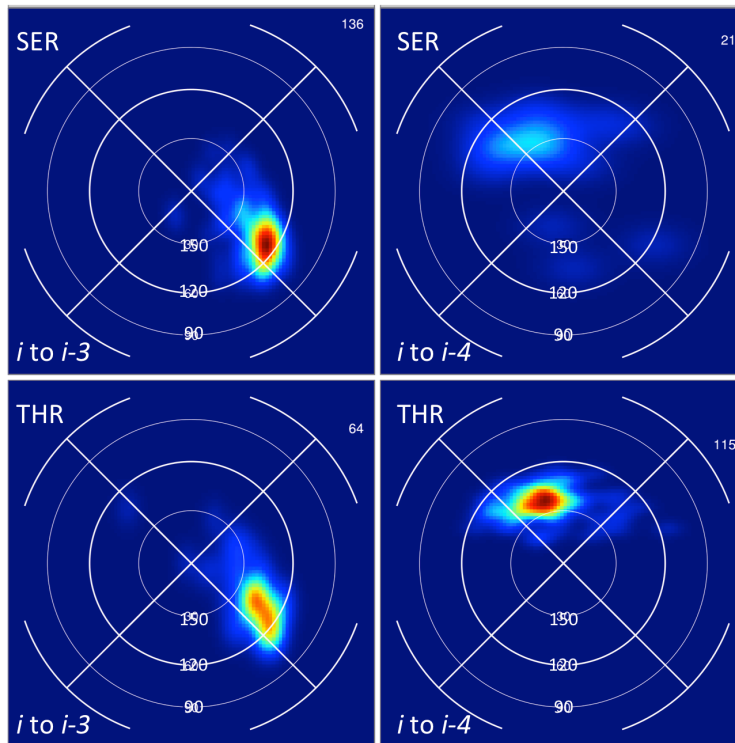

Figure S.3.15: *AHD angle for designed serines and threonines in  $\alpha$ -helices*. When the backbone/sidechain exclusion rule is removed, Rosetta is able to design in very good hydrogen bonds between serines at residue  $i$ , and backbone oxygens at residues  $i - 3$  and  $i - 4$ . This small dataset was created by redesigning 38 large proteins. Counts of each kind of hydrogen bond formed are given in the upper-right corner of each plot.

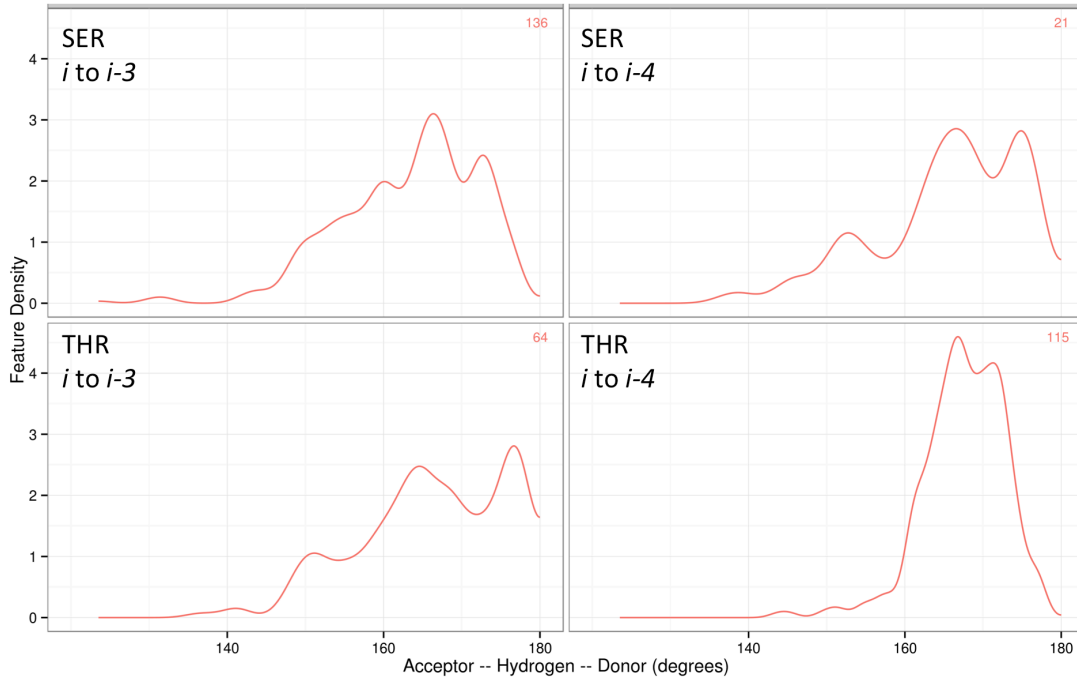



Figure S.3.16: *ElecHBv2* energies for designed serines and threonines in  $\alpha$ -helices. When the backbone/sidechain exclusion rule is removed, Rosetta is able to design in very good hydrogen bonds between serines at residue  $i$ , and backbone oxygens at residues  $i - 3$  and  $i - 4$ . This small dataset was created by redesigning 38 large proteins. Counts of each kind of hydrogen bond formed are given in the upper-right corner of each plot. The maximum unweighted energy for any hydrogen bond in our models is  $-1.5$ ; these hydrogen bonds are not optimal, but they are very favorable. If someone were interested in removing the backbone/sidechain exclusion rule, then they will have to devise a way overcome some very favorable contacts or otherwise face a large number of designed Ser/Thr in helices forming hydrogen bonds to carbonyl oxygens along the helix.

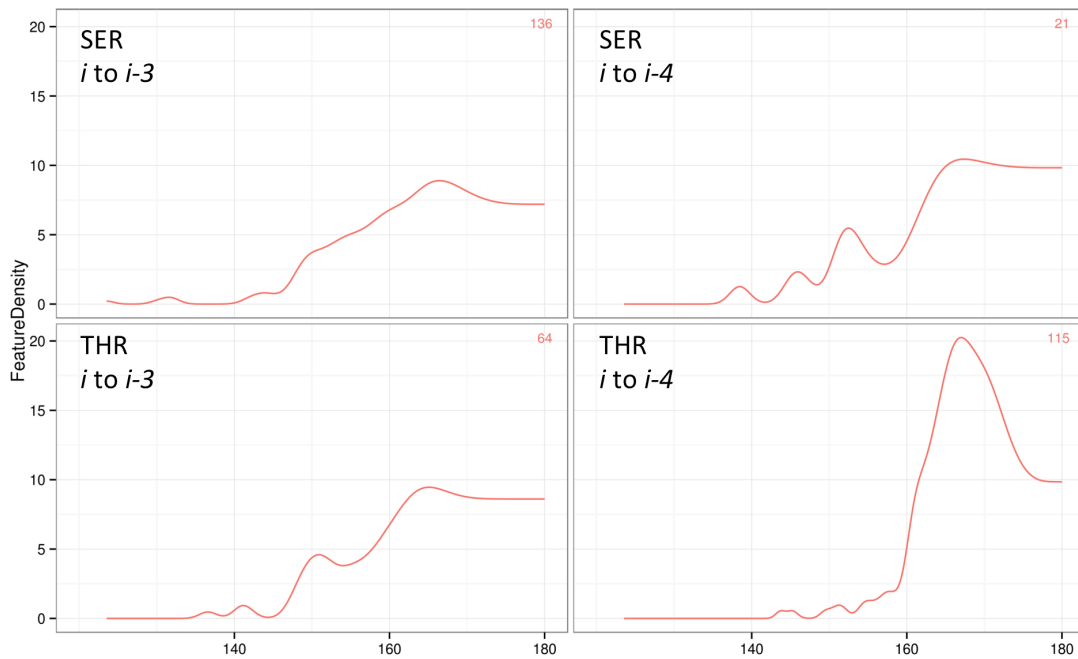

Figure S.3.17: *Problematic fitting of new polynomials for the AHD angle.* The simultaneous constraints that the derivative of the  $\cos(\text{AHD})$  polynomial be zero at  $\text{AHD} = 180^\circ$  and that the polynomial be quite steep in the region near  $\text{AHD} = 180^\circ$  cannot be reconciled with polynomials of degree 11 or less—we did not explore higher degree polynomials. Attempts to fit polynomials when the derivative was constrained to be zero at  $\text{AHD} = 180^\circ$  resulted in polynomials that were insufficiently steep. These polynomials produced  $\text{AHD}$  distributions that placed too little density at  $\text{AHD} = 180^\circ$  and too much density at  $\text{AHD} = 160^\circ$ . Red: Natives. Green: *HBv1*. Blue: A prototype version on *HBv2*, which relied still on  $\cos(\text{AHD})$  polynomials. Shown here are the  $\text{AHD}$  distributions from backbone/backbone hydrogen bonds broken down by sequence separation.

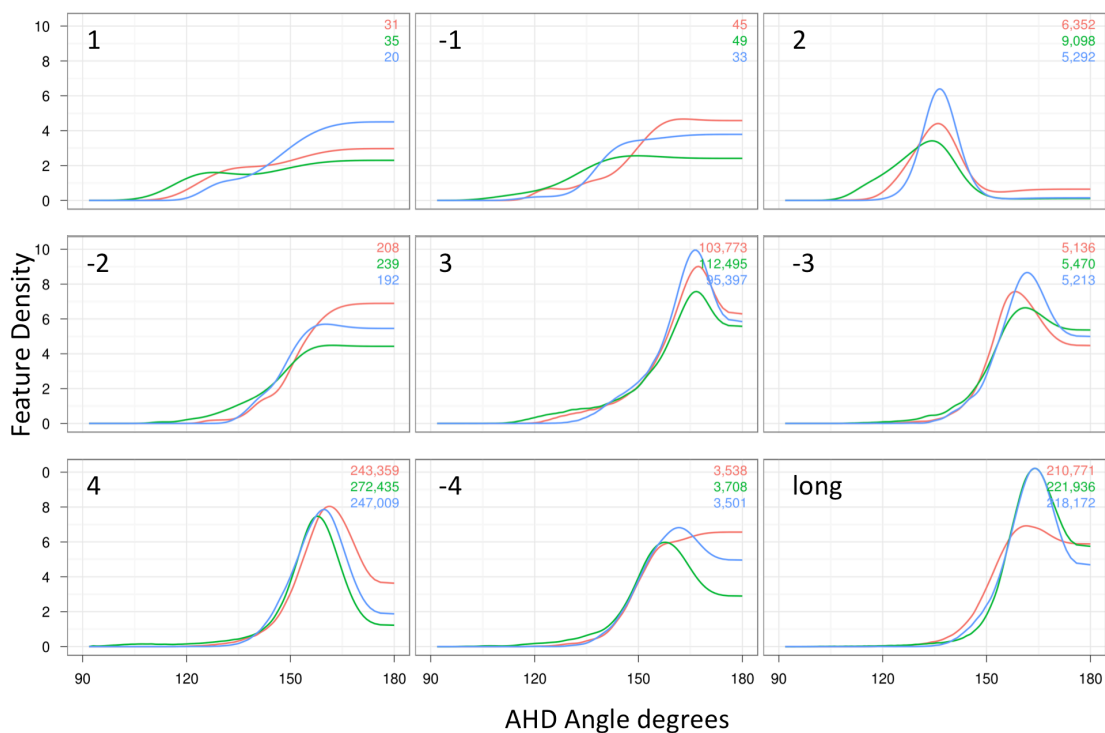

Figure S.3.18: *Fitting AHD polynomials instead of  $\cos(\text{AHD})$  polynomials alleviates the problem.* A polynomial could be fit to match the native distribution for backbone/backbone hydrogen bonds after switching from polynomials of  $\cos(\text{AHD})$  to polynomials of  $\text{AHD}$ . Red: Natives. Green: *HBv1*. Blue: *HBv2*. Shown here are the  $\text{AHD}$  distributions from backbone/backbone hydrogen bonds broken down by sequence separation.

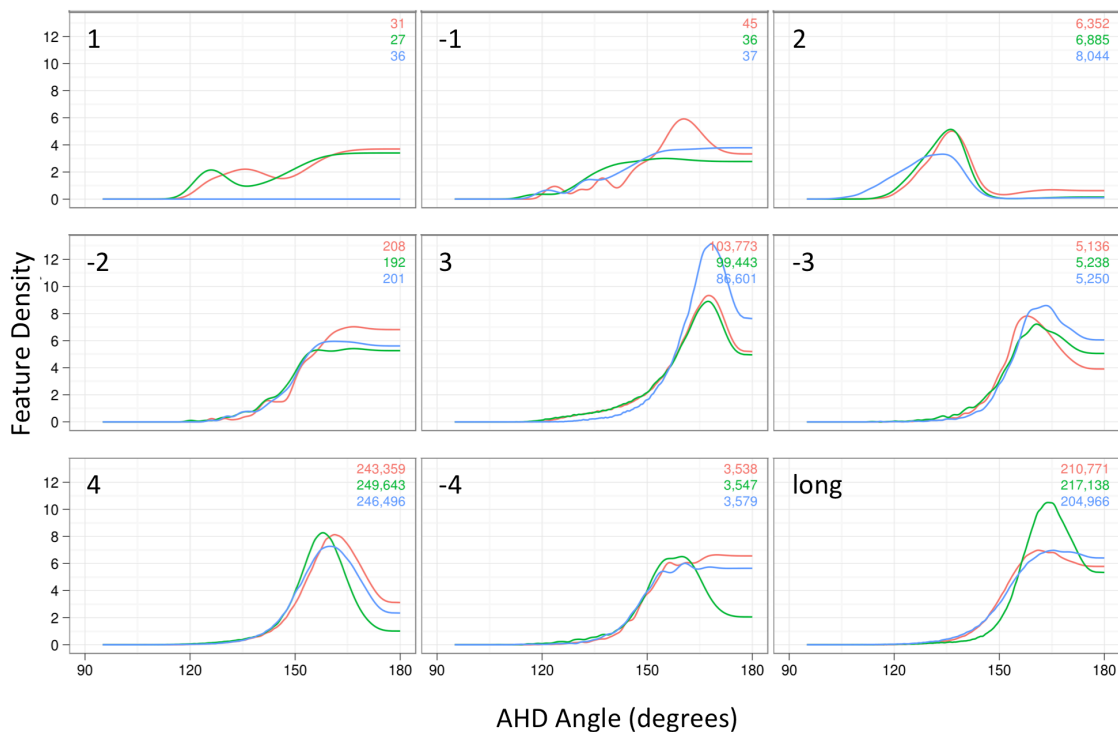

Figure S.3.19: AHD distributions produced by HBv2 broken down by donor and acceptor type. Red: Natives. Green: HBv1. Blue: HBv2.

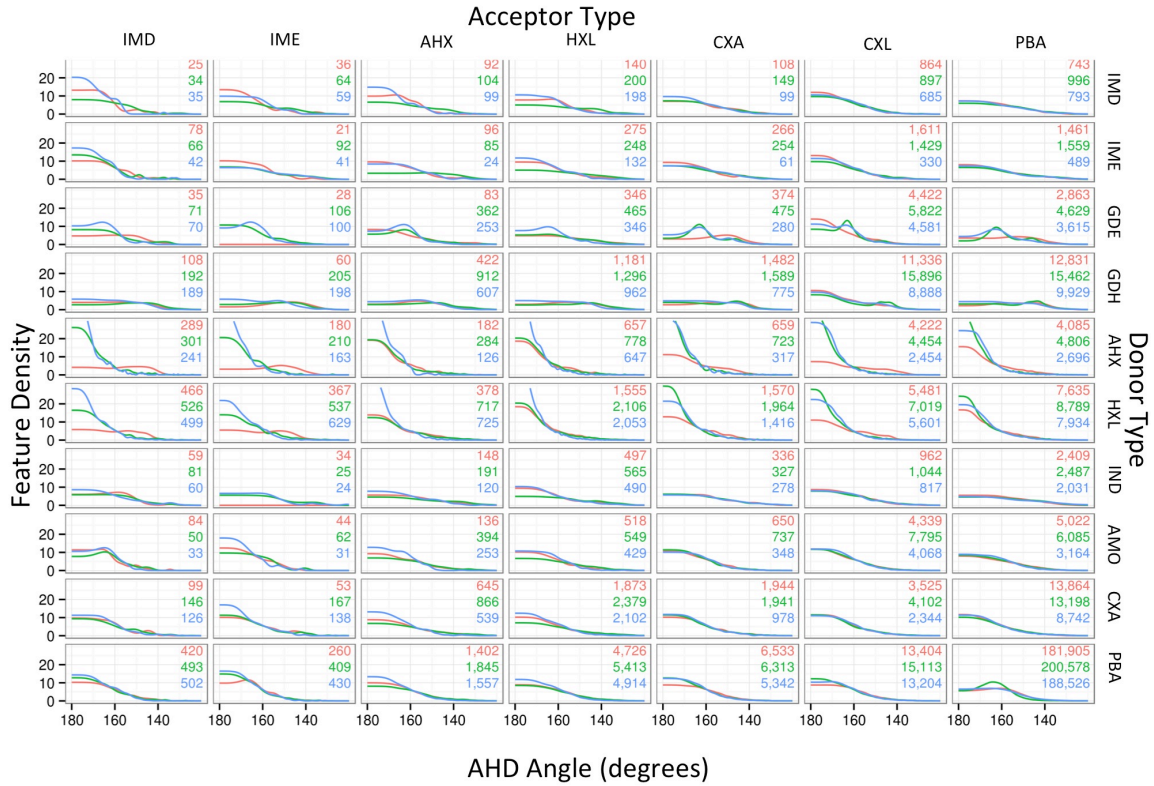

Figure S.3.20. *Derivative discontinuities in HBv1 produce significant artifacts.* This histogram, with bin width of  $1/600 \text{ \AA}$ , shows two peaks in the *HBv1* distance distribution for backbone-backbone hydrogen bonds. The labeled points on the  $x$ -axis, (1.9, 2.1, 2.3) are points of derivative discontinuities in the Score12 H-Bond function due to knots in the piecewise-linear functional form of the fade functions. The Native curve is partially obscured by *ElecHBv2*. These artifacts are easily removed by eliminating the derivative discontinuities.

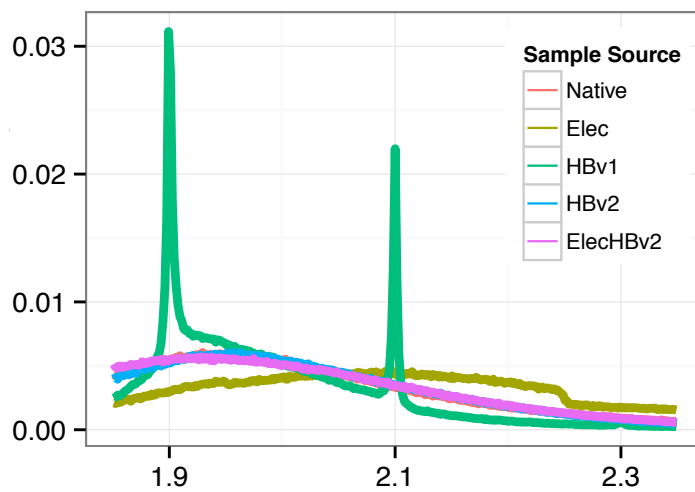

Figure S.3.21. *Apparent distance dependence of the AHD angle distribution.* This figure shows the cumulative distribution function (CDF) for the *AHD* angle, starting at  $180^\circ$  and decreasing towards  $0^\circ$ , broken down by distance windows. The window sizes were chosen so that each window contained roughly the same number of contacts; the windows overlap so that each curve could include a greater number of counts. To generate this figure, the *AHD* angle for every contact with an  $AH_{dis}$  beneath  $4 \text{ \AA}$  was considered instead of considering only those hydrogen bonds where their Rosetta energy was less than 0. Most contacts above  $2.5 \text{ \AA}$  are not hydrogen bonds. In the natives, a trend toward decreasing stringency in the *AHD* angle is apparent as the  $AH_{dis}$  increases. Even if the contacts in the last two windows should not be considered hydrogen bonds, there is nonetheless a difference between the distributions for the first two. This latter difference poses this question: is there an energetic difference in the *AHD* angle that depends on the  $AH_{dis}$ ? *HBv1*, which incorporates a distance dependence into its angular energy component ( $g_s$  vs.  $g_l$  in Equation 7 of the main text), recapitulates the CDF differences decently well. *ElecHBv2*, which does not include a distance dependence in its angular energy component, does a better job matching the native CDFs. Our interpretation here is that the *AHD* angle prefers to be linear for very close contacts to minimize the electrostatic repulsion between the acceptor and donor heavy atoms; at slightly longer distances, this repulsion is less and less linear *AHD* angles are acceptable.

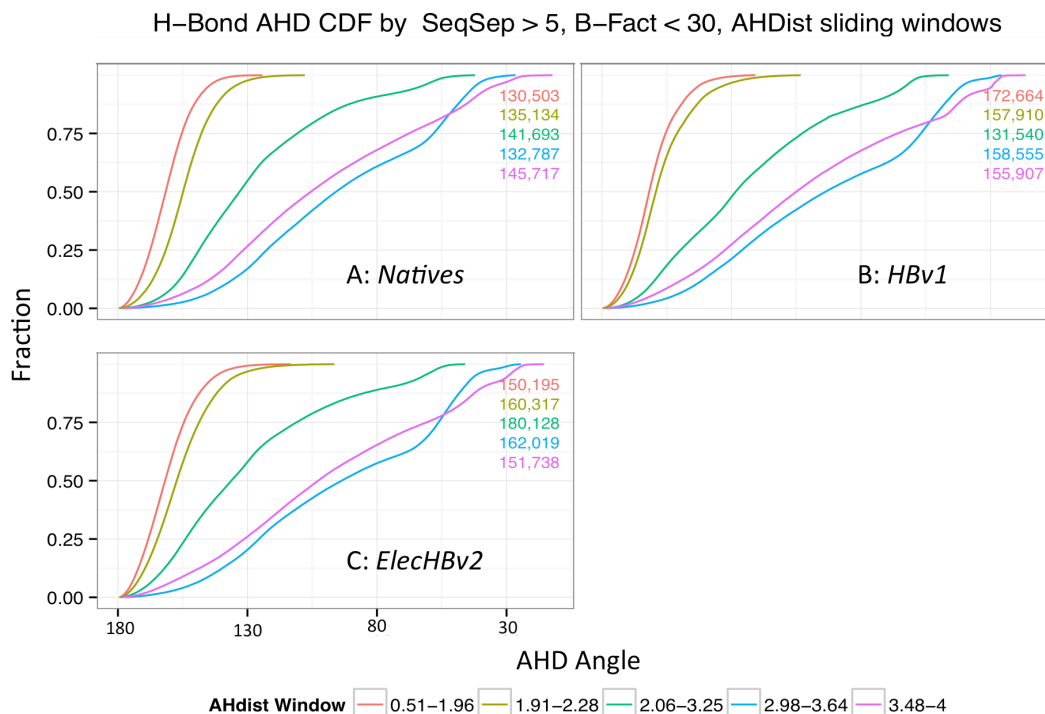

Figure S.3.22. *Distance dependence of the angular terms in the HBv1 model.* Given a particular  $AH_{dis}$ ,  $BAH$  angle, and  $AHD$  angle for an amino-carboxylate (K-D/E) hydrogen bond, the *HBv1* energy can be calculated using the fifteen cells below. Each cell produces a function value. Multiply the function values across the rows then sum these products to produce the hydrogen bond energy. For this donor/acceptor pair, the long-range polynomials have a shallower well depth than the short-range polynomials for both the  $AHD$  and  $BAH$  angles. Consider a hydrogen bond with  $AHD = 180^\circ$  and  $AH_{dis} = 2.3 \text{ \AA}$ . Now, if the  $AH_{dis}$  decreases towards  $1.9 \text{ \AA}$  while the  $AHD$  angle remains fixed, then the contribution from  $g_s$  increases and the contribution from  $g_l$  decreases. The same observation applies for the contribution of  $h_s$  and  $h_l$  for a  $BAH$  angle of  $120^\circ$ . The distance term and the angular terms all encode a preference for short  $AH_{dis}$  values. This produces overly sharp  $AH_{dis}$  distributions in *HBv1*.

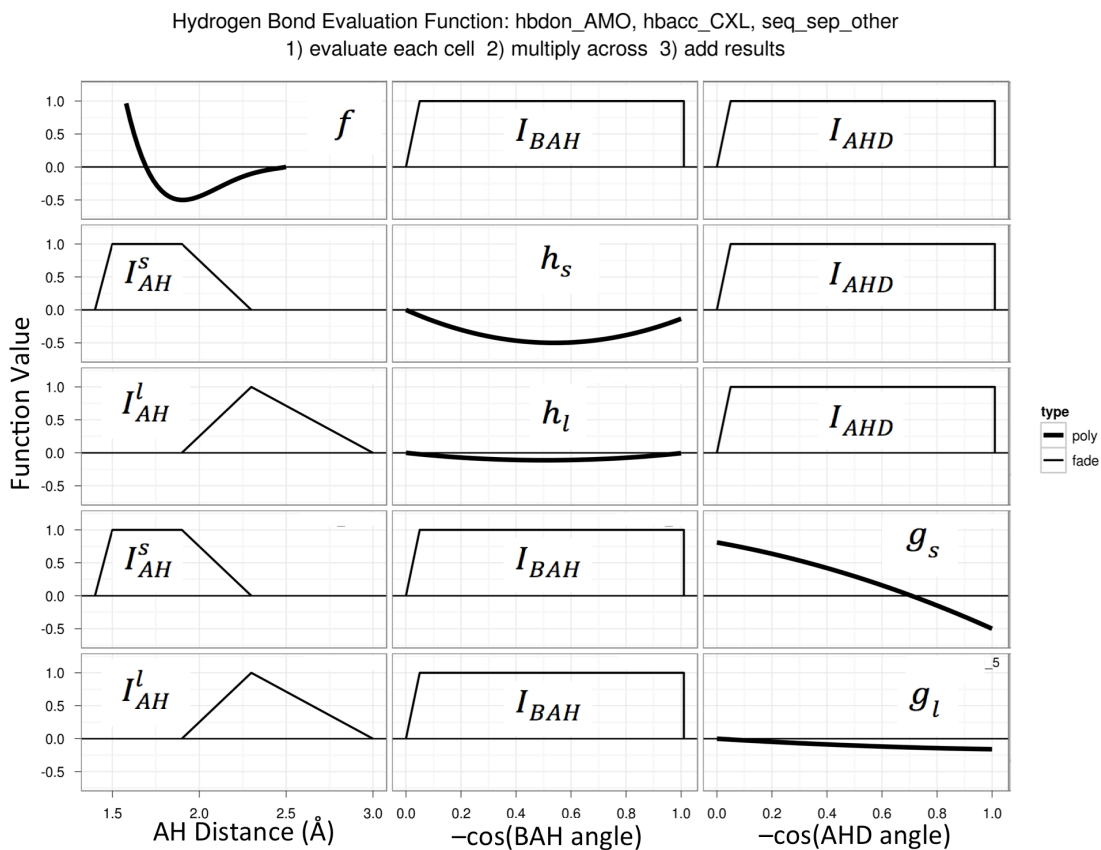

Figure S.3.23: Backbone/backbone acceptor-hydrogen distance ( $AH_{dis}$ ) distributions by sequence separation. The sharp peaks in the *HBv1* distance distributions are the result of derivative discontinuities as described in Figure S.3.20. In *HBv2*, a single  $AH_{dis}$  polynomial was fit to describe all backbone/backbone H-bonds, whereas in *HBv1* there were separate polynomials for  $SeqSep = 4$ ,  $SeqSep < 4$  and  $SeqSep > 4$ . Red: Natives. Green: *HBv1*. Blue: *HBv2*.

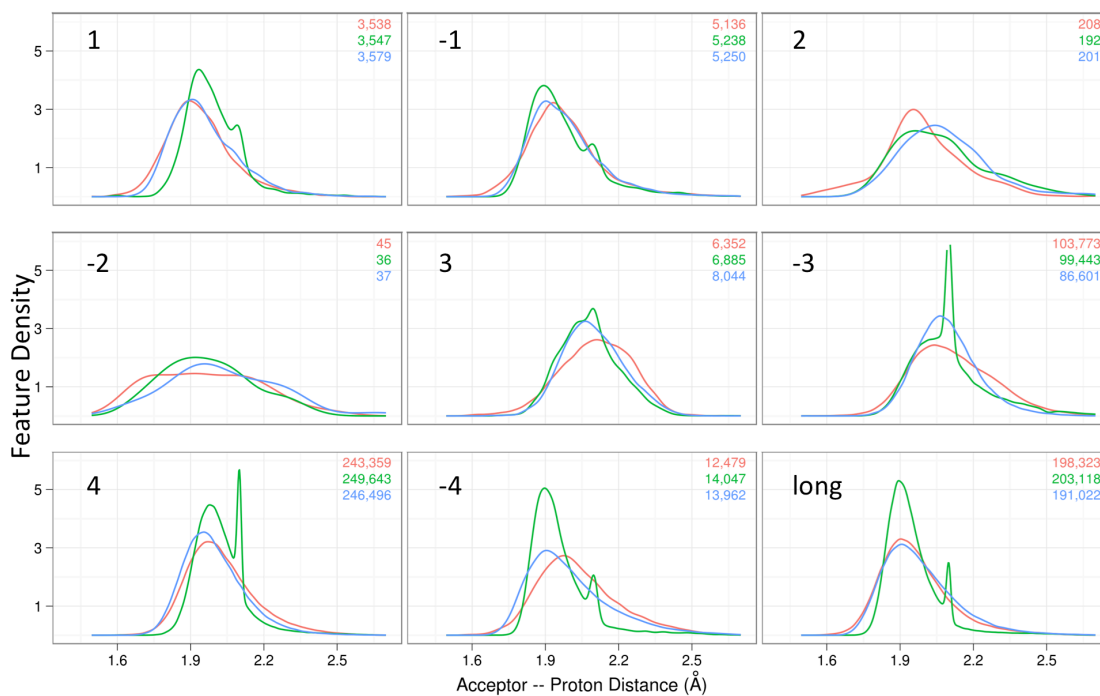



Figure S.3.24: Acceptor-hydrogen distance ( $AH_{dis}$ ) distributions broken down by donor and acceptor type. REDUCE (Word, Lovell, Richardson, & Richardson, 1999) was used to infer hydrogen locations for the natives. Red: Natives. Green: HBv1. Blue: HBv2.

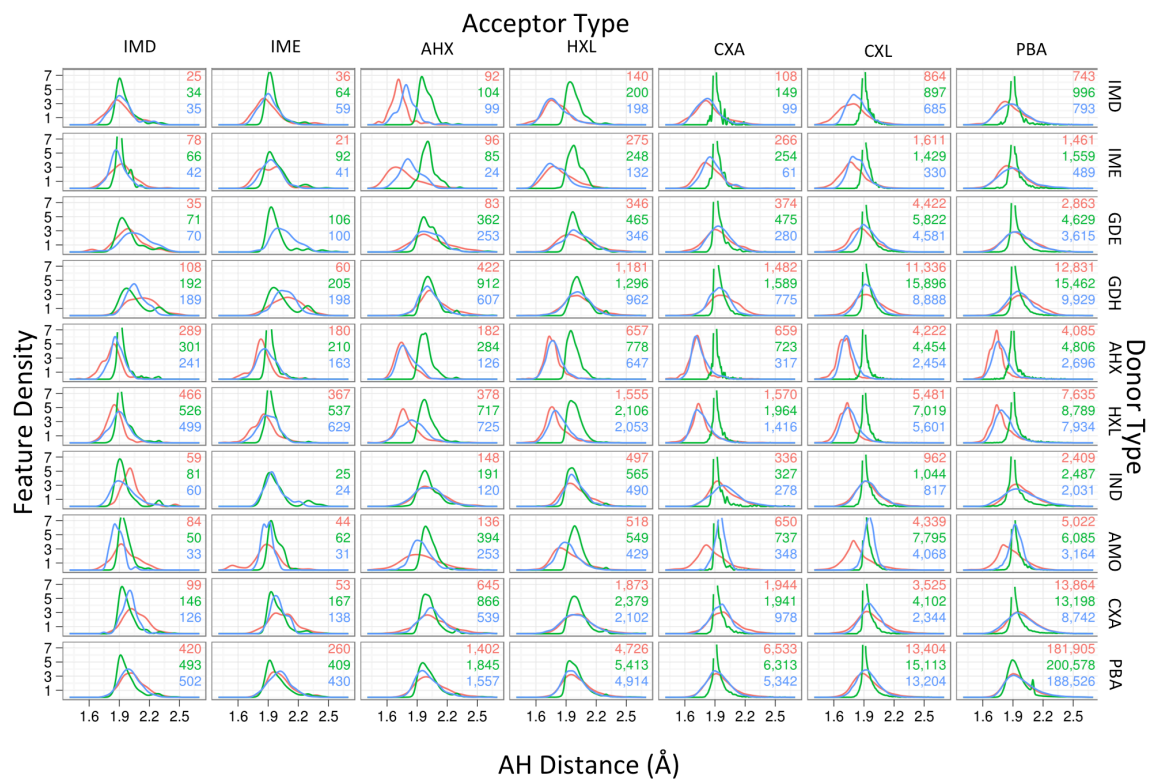

Figure S.3.25: Acceptor to donor-heavyatom distance ( $AD_{dis}$ ) distributions broken down by donor and acceptor type. Red: Natives. Green: HBv1. Blue: HBv2.

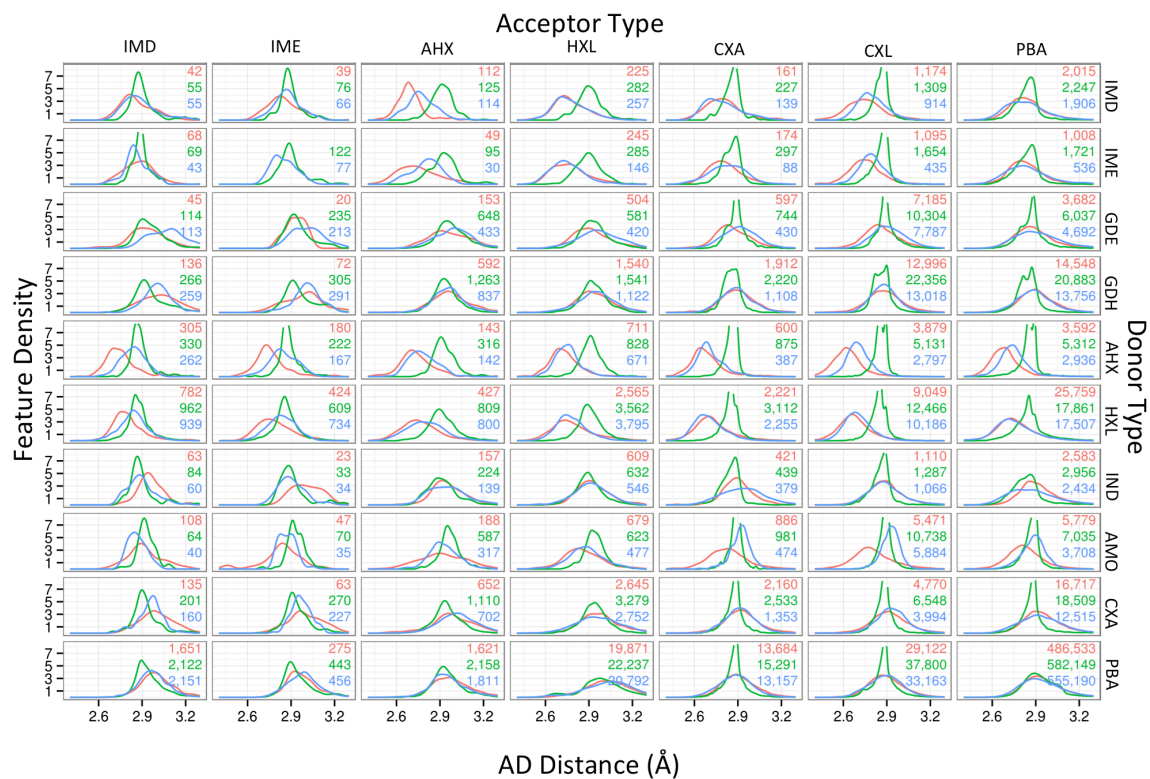

Figure S.3.26: *Recapitulation of putative carbon H-bonds in anti-parallel  $\beta$ -sheets* (A) In anti-parallel  $\beta$ -sheets, the close contact ( $H_{\alpha}$ , O) distance feature (green dashed lines) is shown. The tight distribution for this distance has been attributed to an attractive “carbon H-bond” between these atoms. (B) Kernel density estimation of the ( $H_{\alpha}$ , O) feature distribution by sample source. The *Elec*, *HBv2* and *ElecHBv2* sample sources recapitulate the Native distribution better than the *HBv1* sample source, indicating that modeling the  $sp^2$  character of carbonyl acceptors and/or the electrostatic attraction between  $H_{\alpha}$  is sufficient to recapitulate this feature distribution.

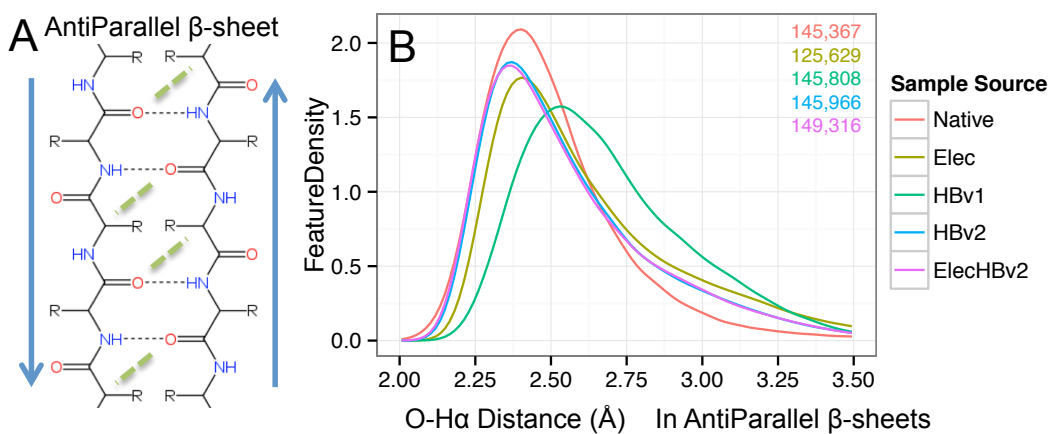

Berman, H. M., Westbrook, J., Feng, Z., Gilliland, G., Bhat, T. N., Weissig, H., ... Bourne, P. E. (2000). The Protein Data Bank. *Nucleic Acids Research*, 28(1), 235–42.

Bradley, P., Misura, K. M. S., & Baker, D. (2005). Toward high-resolution de novo structure prediction for small proteins. *Science*, 309(5742), 1868–71. doi:10.1126/science.1113801

## S.4 Model Details

### S.4.1 HBv2

#### S.4.1.1 HBv2 Chemical Types

HBv2 H-Bond Model chemical types in canonical proteins. Blue groups are donors with arrows pointing towards the acceptor and red groups are acceptors with arrows pointing from donors at canonical lone pairs. The base atoms (B, and BB) are labeled. Note, for Histidine, the B atom is the midpoint between the two carbons binding the nitrogen.

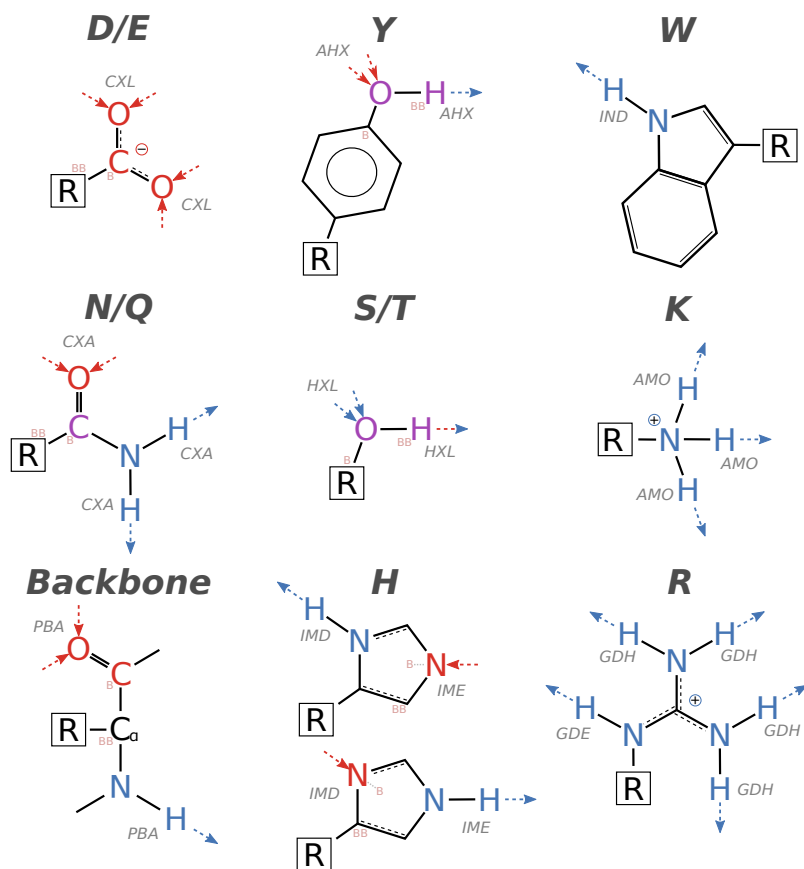

HBv2 H-Bond Model Acceptor Chemical Type Codes

|   | Code       | Name                   | Example Rosetta Atom     |
|---|------------|------------------------|--------------------------|
| 1 | hbacc_NONE |                        |                          |
| 2 | hbacc_PBA  | Protein Backbone Amide | Protein Backbone OCbb    |
| 3 | hbacc_CXA  | Carboxamide            | ASN OD1; Gln OE1         |
| 4 | hbacc_CXL  | Carboxyl               | ASP OD{1 2}; Glu OE{1 2} |
| 5 | hbacc_IMD  | Imidazole Delta        | HIS ND1 (NE2 protonated) |
| 6 | hbacc_IME  | Imidazole Epsilon      | HIS NE2 (ND1 protonated) |
| 7 | hbacc_AHX  | Aromatic Hydroxyl      | TYR OH                   |
| 8 | hbacc_HXL  | Hydroxyl               | SER OG; THR OG1          |

HBv2 H-Bond Model HBond Donor Chemical Type Codes

|    | Code       | Name                   | Example Rosetta Atom                 |
|----|------------|------------------------|--------------------------------------|
| 1  | hbdon_NONE |                        |                                      |
| 2  | hbdon_PBA  | Protein Backbone Amide | Protein Backbone Nbb--HNbb           |
| 3  | hbdon_CXA  | Carboxamide            | ASN ND2--{1 2}HD2; Gln NE2--{1 2}HE2 |
| 4  | hbdon_IMD  | Imidazole Delta        | HIS ND1--HE2 (NE2 not protonated)    |
| 5  | hbdon_IME  | Imidazole Epsilon      | HIS NE2--HE2 (ND1 not protonated)    |
| 6  | hbdon_IND  | Indole                 | TRP NE1--HE1                         |
| 7  | hbdon_AMO  | Amino                  | LYS NZ--{1 2 3}HZ                    |
| 8  | hbdon_GDE  | Guanidino Epsilon      | ARG NE--HE                           |
| 9  | hbdon_GDH  | Di-Hydro Guanidino     | ARG NH{1 2}--{1 2}HH{1 2}            |
| 10 | hbdon_AHX  | Aromatic Hydroxyl      | TYR OH--HH                           |
| 11 | hbdon_HXL  | Hydroxyl               | SER OG--HG; Thr OG1--HG1             |
| 12 | hbdon_H2O  | Water                  | H2O O--H{1 2} ((TP5/TP3 models)      |

### S.4.1.2 Other Models Considered

Before arriving at the final  $h_{BA_\chi}^2$  model used for  $sp^2$  hybridized acceptors in *HBv2*, we explored several other models. The first model we considered,  $h_{BA_\chi}^a$ , applied a multiplicative term for all  $sp^2$  hybridized acceptors that depended on  $BA_\chi$  to scale the other three terms of the energy function:

$$E_{HBv2}^a = \min(0, h_{BA_\chi}^a (f_{AH_{dis}}^a I_{AHD} I_{BAH} + g_{AHD}^a I_{AH} I_{BAH} + h_{BAH}^a I_{AH} I_{AHD})) \quad (1)$$

$$h_{BA_\chi}^a(BA_\chi) = p_1^a (2BA_\chi) + p_1^a \quad (2)$$

with tunable parameters  $p_1^a$  and  $p_1^a$ . (We had already removed the short- and long-range distinction from the potential, though we still relied on the fade functions). The form of  $h_{BA_\chi}^a$  encodes the  $sp^2$  preference by peaks at  $BA_\chi=0^\circ$  and  $180^\circ$  and troughs at  $90^\circ$  and  $270^\circ$ . This functional form and the one used by Morozov *et al.* (2003)—i.e.  $E_{\text{Morozov}} = f_{AHdis} + g_{AHD} + h_{BAH} + i_{BA_\chi}$ , where  $i_{BA_\chi}$  was a knowledge-based polynomial of  $BA_\chi$ —both suffer from a numerical instability in the measurement of  $BA_\chi$  when  $BAH$  is near  $180^\circ$ : small variations in the hydrogen coordinate produce large variations in the measured  $BA_\chi$  dihedral and thus large variations in the energy.  $BA_\chi$  and  $BAH$  have to be considered simultaneously.

We next considered three functions,  $E_{HBv2}^b$ ,  $E_{HBv2}^c$ , and  $E_{HBv2}^d$ , based on a single functional form and controlled by three parameters,  $p_1^i$ ,  $p_2^i$ , and  $p_3^i$  for  $i \in \{b, c, d\}$ :

$$E_{HBv2}^i = \min(0, h_{BAH,BA_\chi}^i * (f_{I_{AHD}I_{BAH}} + g_{I_{AH}I_{BAH}})) \quad (3)$$

$$h_{BAH,BA_\chi}^i = p_1^i + p_2^i \left( \frac{\cos(\pi - 3BAH) + 1}{2} \right) + p_3^i \frac{\cos(2BA_\chi) + 1}{2} \left( 1 - \frac{\cos(\pi - 3BAH) + 1}{2} \right) \quad (4)$$

In this model, the larger the value of  $h_{BAH,BA_\chi}^i$ , the stronger the hydrogen bond.  $h_{BAH,BA_\chi}^i$  combines the  $BA_\chi$  preference for  $0^\circ$  or  $180^\circ$  from the  $\cos(2BA_\chi)$  term, and the  $BAH$  preference for  $120^\circ$  from the  $\cos(\pi - 3BAH)$  term. As  $BAH$  approaches  $180^\circ$ , the contribution from  $BA_\chi$  diminishes, thereby avoiding any numerical instability. The three parameters represent three steps upward from 0;  $p_1^i$  is a first step upwards and is applied uniformly;  $p_2^i$  is a step upwards for values of  $BAH$  near  $120^\circ$ ;  $p_3^i$  is a final step upwards for values of  $BAH$  near  $120^\circ$  and  $BA_\chi$  near either  $0^\circ$  or  $180^\circ$  (Fig. S.3.5). The  $h_{BAH,BA_\chi}^i$  functions were applied to all  $sp^2$ -hybridized acceptors for all interactions, including those where the native distributions for the  $BAH$  did not show a peak at  $120^\circ$ , such as the backbone/backbone H-bonds in  $\beta$ -sheets. This is quite different from  $HBv1$  where the  $h_{BAH}^1$  polynomial used to define backbone/backbone H-bonds with sequence separation less than five placed the optimal  $BAH$  angle at  $150^\circ$ , and the backbone/backbone H-bonds with sequence separation greater than or equal to five placed the optimal  $BAH$  angle at  $158^\circ$ , giving  $\alpha$ -helical and  $\beta$ -sheet contacts different definitions of what is ideal. The  $E_{HBv2}^b$  function was defined by  $p_1^b = 1$ ,  $p_2^b = 0$ , and  $p_3^b = 1$ ;  $p_1^b$  and  $p_3^b$  were fit empirically, and  $p_2^b$  was held fixed at 0. This functional form gives no reward for having  $BAH$  near  $120^\circ$  if  $BA_\chi$  was not also near  $0^\circ$  or  $180^\circ$  (Fig. S.3.5A&D)

$E_{HBv2}^b$  reproduced many of the same features of the native distributions that  $E_{HBv2}$  would eventually also reproduce. It reproduced the sinusoidal behavior of  $BA_\chi$  for carboxylate-hydroxyl and carboxamide-hydroxyl H-bonds and the difference in amplitudes between them. It reproduced the beetle shape in the Lambert-azimuthal projection for long-range backbone-backbone hydrogen bonds as well as the non-sinusoidal  $BA_\chi$  distribution. It reproduced the strong preference for a  $BA_\chi$  dihedral of  $180^\circ$  that carboxyl-guanidino H-bonds show.

$E_{HBv2}^b$  failed to reproduce some of the native distributions; the  $BA_\chi$  distributions for most sidechain-backbone H-bonds displayed a stronger sinusoidal behavior than is observed

in natives, such that  $E_{\text{HBv2}}^b$  distributions are out-of-phase with the relatively flat distributions seen in natives. For carboxyl-hydroxyl hydrogen bonds, the Lambert-azimuthal projection shows  $E_{\text{HBv2}}^b$  clustering density too tightly near the peak at  $BAH = 120^\circ$  and  $BA_\chi = 0^\circ$  or  $180^\circ$ , whereas the natives displayed a broader distribution that fanned out. It also failed to recapitulate the backbone-acceptor/amino-donor (i.e. lysine) distribution observed in the Lambert-azimuthal projection, which places significant density near  $BAH = 180^\circ$ . To examine whether these last two deficiencies might be a result of the functional form, we tested two forms,  $E_{\text{HBv2}}^c$ , and  $E_{\text{HBv2}}^d$ , which varied in their treatment of  $p_2^i$ :  $E_{\text{HBv2}}^c$  set  $p_2^c$  to be positive (Fig. S.3.5B&E) to hopefully spread out the carboxyl-hydroxyl distribution (making  $BAH$  near  $120^\circ$  favorable outside of the range near  $BA_\chi = 0$  or  $180^\circ$ );  $E_{\text{HBv2}}^d$  set  $p_2^d$  to be negative (Supp. Fig. S.3.5C&F) to hopefully put more density near  $BAH = 180^\circ$  for the backbone-amino hydrogen bonds. Though we did not extensively tune the three parameters controlling the shape of these potentials, it was rapidly clear that they degraded the beetle distribution for backbone/backbone H-bonds in  $\beta$ -sheets (Fig. S.3.6). We did not to pursue  $E_{\text{HBv2}}^c$  and  $E_{\text{HBv2}}^d$  any further.

These functional forms represented a significant departure from  $E_{\text{HBv1}}$ , besides their dependence on  $BA_\chi$ , in that they coupled multiple geometries together. In  $E_{\text{HBv1}}$ , an improvement in the  $AHD$  geometry has no effect on energetic contribution from the  $BAH$  geometry, and vice versa. In  $E_{\text{HBv2}}^b$ , however, an improved  $AHD$  angle puts pressure on  $BAH$  to improve; the derivatives wrt  $BAH$  are dependent on  $AHD$ . This coupling seemed apparent in the joint distribution of  $BAH$  and  $AHD$  angles for bidentate carboxyl-guanidino (ASP to ARG) H-bonds. In the native structures, there was a broad distribution of  $BAH$  and  $AHD$  angles with a broad peak near  $AHD \sim 145^\circ$  and  $BAH \sim 140^\circ$  (Supp. Fig. 3.7A). In forming a pair of hydrogen bonds,  $E_{\text{HBv2}}^b$  prefers to create one H-bond with nearly ideal angles— $AHD \sim 180^\circ$  and  $BAH \sim 120^\circ$ —and the second H-bond with worse angles –  $AHD \sim 150^\circ$  and  $BAH \sim 150^\circ$ . This can be seen in the presence of two separate peaks (Supp. Fig. 3.7B). It appeared that  $E_{\text{HBv2}}^b$  was creating one strong hydrogen bond and one weak hydrogen bond. In other words, it would load all the bad geometry into one of the hydrogen bonds, and keep the other one ideal, as might be expected from its functional form. An additive functional form would allow the energy to slosh between the two hydrogen bonds formed in a bidentate interaction, but in the multiplicative form a good  $AHD$  angle has to be paired with a good  $BAH$  angle to really count. Observing the presence of the two peaks in this joint  $AHD/BAH$  distribution, we sought out a functional form,  $E_{\text{HBv2}}$ , that decoupled  $AHD$  and  $BAH$ ; we would only later understand the actual reason for the distribution that  $E_{\text{HBv2}}^b$  produced.

$E_2$  did not change the distribution of  $BAH$  vs  $AHD$  for ARG/ASP bidentate hbonds, even though that is why we pursued this functional form over  $E_{\text{HBv2}}^b$ . It turns out that our problem stemmed from the “ideal” bond angles used to define the atomic positions in Arginine. We noticed that the bimodal distribution disappeared from the models generated by *ElecHBv2* (described in detail later), which included a fix for these angles that had been proposed earlier were but not enabled by default (Song 2011). Fixing the ideal bond geometries for *HBv2* removes the bimodal distribution and furthermore, reverting to the old (bad) angles to *ElecHBv2* reinstates the bimodal distribution. Indeed, the  $E_{\text{HBv2}}^b$  functional form delivers a single broad distribution when the improved bond angles are used (Fig. S.3.7). We cannot thus conclude that  $E_{\text{HBv2}}^b$  is a worse functional form than  $E_{\text{HBv2}}$ .

### S.4.1.3 $sp^2$ functional form

We formulated our  $sp^2$  potential as follows. In  $E_{\text{HBv2}}$  from Equation 2, the function  $h_{\text{BAH},\text{BA}_\chi}^2$  for  $sp^2$  hybridized acceptors is given by

$$h_{\text{BAH},\text{BA}_\chi}^2 = \alpha F + (1 - \alpha)G \quad (5)$$

$$\alpha = \frac{1}{2} \cos(2\text{BA}_\chi) + \frac{1}{2} \quad (6)$$

$$F \left\{ \begin{array}{ll} \frac{d}{2} \cos(3(\pi - \text{BAH})) + \frac{d-1}{2} & \text{if } \text{BAH} > 2\pi/3 \\ \frac{m}{2} \cos\left(\pi - \frac{\frac{2}{3}\pi - \text{BAH}}{l}\right) + \frac{m-1}{2} & \text{if } 2\pi/3 \geq \text{BAH} \geq \pi(2/3 - l) \\ m - \frac{1}{2} & \text{o.w.} \end{array} \right. \quad (7)$$

$$G \left\{ \begin{array}{ll} d - \frac{1}{2} & \text{if } \text{BAH} > 2\pi/3 \\ \frac{m-d}{2} \cos\left(\pi - \frac{\frac{2}{3}\pi - \text{BAH}}{l}\right) + \frac{m+d-1}{2} & \text{if } 2\pi/3 \geq \text{BAH} \geq \pi(2/3 - l) \\ m - \frac{1}{2} & \text{o.w.} \end{array} \right. \quad (8)$$

where the  $\alpha$  function interpolates between  $F$  and  $G$  depending on the value of  $\text{BA}_\chi$  (Figure 2).

**BAH:**  $\text{BAH} = \pi$  when the Base-Acceptor-Hydrogen atoms are co-linear and  $\text{BAH} = \frac{\pi}{2}$  when they form a right angle.

**$\text{BA}_\chi$ :**  $\text{BA}_\chi$  is defined by the Abase2-Base-Acceptor-Hydrogen atoms the  $sp^2$  orbitals are in the Abase2-Base-Acceptor plane. For backbone acceptors  $\text{Abase2}=\text{C}\alpha$ .

**$d$ :**  $d$  parameter is the distance define by `HBondOptions::sp2_BAH180_rise()`, set by the `corrections::score::hb_sp2_BAH180_rise` flag and defaults to 0.75.

**$m$ :**  $m$  is the distance from the minimum to maximum values F and defaults to 1.6

**$l$ :**  $l$  is the period/2 of the  $\text{BAH} = 120^\circ$  to  $\text{BAH} = 60^\circ$  piece of F, empirically fit to be 0.357



## S.4.2 Electrostatics Model

Here is reference implementation of the Elec model in the R language. The atomic charges are in the residue\_atoms.csv supplementary file and hyper parameters of parameters min\_dist = 1.6, max\_dist = 5.5 and dielectric of 10.

```
#returns:
# f''(x1), f''(x2)
make_second_derivative <- function(
  x1, x2,
  y1, y2, # f'(x1), f'(x2)
  yp1, yp2 # f'(x1), f'(x2)
){
  ypp1 = -0.5
  u = (3.0/(x2-x1)) * ((y2-y1)/(x2-x1)-yp1)
  qn = 0.5
  un = (3.0/(x2-x1))*(yp2-(y2-y1)/(x2-x1))
  ypp2 = (un-qn*u)/(qn*y2+1.0)
  ypp1 = ypp1 * y2 + u
  c(ypp1, ypp2)
}

# a = x1
# b = x2
# c = y2
# d = y1
# e = f''(x2)
# f = f''(x1)
cubic_polynomial_from_spline <- function(
  a, b, c, d, e, f){
  c(
    c0=((b**3*f - a**3*e)/(b-a) + (a*e - b*f) * (b-a))/6 + (b*d - a*c)/(b-a),
    c1=(3*a*a*e/(b-a) - e*(b-a) + f*(b-a) - 3*b*b*f/(b-a))/6 + (c - d)/(b-a),
    c2 = (3*b*f - 3*a*e)/(6*(b-a)),
    c3 = (e - f)/(6*(b - a)))
}

eval_cubic_polynomial <- function(x, poly){
  ((poly[4]*x+poly[3])*x+poly[2])*x+poly[1];
}

# d = distance between charges (q1, q2)
# n_bond_sep = number of covalent bonds between q1 and q2
# die = dielectric
# min_dist, max_dist = where to where to evaluate energy
# smoothed +/- .25 around min_dist and max_dist
coulomb_energy <- function(d, q1, q2, n_bond_sep, die=10.0, min_dist=1.6,
max_dist=5.5){
  if(n_bond_sep < 4L){
    return(0.0)
  } else if(n_bond_sep == 5L){
    sep_weight = 0.2
  } else {
    sep_weight = 1.0
  }
}

C0 <- 322.0637
```

```

C1 <- C0 / die
C2 <- C1 / (max_dist * max_dist)

low_poly_start <- min_dist - 0.25
low_poly_start_score <- C1/(min_dist**2) - C2
low_poly_start_deriv <- 0

low_poly_end <- min_dist + 0.25
low_poly_end_score <- C1/(low_poly_end * low_poly_end) - C2;
low_poly_end_deriv <- -2*C1/(low_poly_end**3);

low_poly_deriv2 <- make_second_derivative(
  low_poly_start, low_poly_end,
  low_poly_start_score, low_poly_end_score,
  low_poly_start_deriv, low_poly_end_deriv)
low_poly_start_deriv2 <- low_poly_deriv2[1]
low_poly_end_deriv2 <- low_poly_deriv2[2]

low_poly <- cubic_polynomial_from_spline(
  low_poly_start, low_poly_end,
  low_poly_end_score, low_poly_start_score,
  low_poly_end_deriv2, low_poly_start_deriv2 )

hi_poly_start <- max_dist - 1.0
hi_poly_start_score = C1/(hi_poly_start**2) - C2;
hi_poly_start_deriv = -2*C1/(hi_poly_start**3);

hi_poly_end <- max_dist
hi_poly_end_score <- 0
hi_poly_end_deriv <- 0

hi_poly_deriv2 <- make_second_derivative(
  hi_poly_start, hi_poly_end,
  hi_poly_start_score, hi_poly_end_score,
  hi_poly_start_deriv, hi_poly_end_deriv)
hi_poly_start_deriv2 <- hi_poly_deriv2[1]
hi_poly_end_deriv2 <- hi_poly_deriv2[2]

hi_poly <- cubic_polynomial_from_spline(
  hi_poly_start, hi_poly_end,
  hi_poly_end_score, hi_poly_start_score,
  hi_poly_end_deriv2, hi_poly_start_deriv2 );

if (d > max_dist) {
  return(0.0);
} else if (d < low_poly_start) {
  return(sep_weight * q1 * q2 * low_poly_start_score);
} else if (d < low_poly_end) {
  return(sep_weight * q1 * q2 * eval_cubic_polynomial( d, low_poly ));
} else if (d > hi_poly_start) {
  return(sep_weight * q1 * q2 * eval_cubic_polynomial( d, hi_poly ));
} else {
  return(sep_weight * q1 * q2 * (C1/(d*d) - C2));
}
}

```

S.4.2.1 Evaluation of the Elec model over all pairs of backbone atom types. These energies, along with energies involving sidechains are summed and linearly weighted into the overall energy function. The black vertical lines indicate the min\_dist and max\_dist values, where the smoothing end and begin.

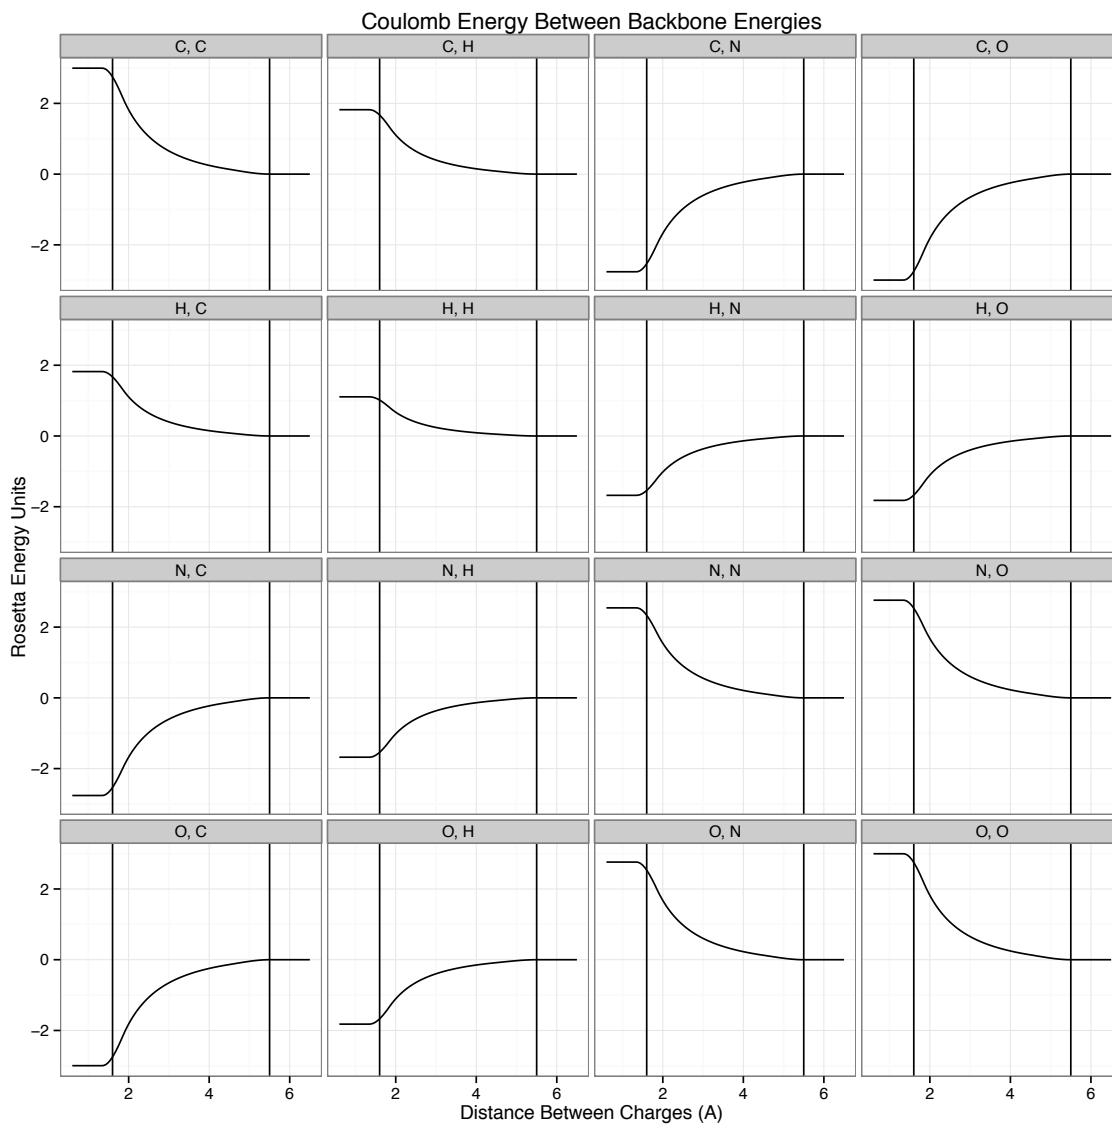

### S.4.3 Disulfide Model

Ideally, the energy function should ensure that optimization of near-native conformations converges to the native conformation. For this to happen, the native structures should be at the global minimum in the energy landscape—a necessary condition for that to be true is that the energy gradient of native conformations must be zero. Inspection of per-atom gradients by energy term in Rosetta-refined crystal structures (Dimaio 2013) revealed large gradients in the disulfide-bond energy term. To further investigate, we compared the distributions of disulfide-bond features (the SG-SG distance, C $\beta$ -SG-SG angle, C $\alpha$ -C $\beta$ -SG-SG dihedral, and C $\beta$ -SG-SG-C $\beta$  dihedral) estimated from the Top8000, yielding 1920 disulfide bonds (*native*), with the distributions from 50 small disulfide-containing proteins containing 191 disulfide bonds that were refined with Rosetta (*old*). We observed a substantial discrepancy in both the SG-SG distance and C $\beta$ -SG-SG angle distributions (Fig. S.4.3.1).

To improve the disulfide model, we developed a new functional form of a skewed Gaussian to model the SG-SG distance feature, and mixtures of 1, 2, and 3 von Mises functions, respectively, to model the C $\beta$ -SG-SG angle and the C $\alpha$ -C $\beta$ -SG-SG and C $\beta$ -SG-SG-C $\beta$  dihedrals (Fig. S.4.3.2). Initially, we fit the potential to match the native distributions. To balance against the other terms in the energy function, we then added a constant offset to the disulfide energy. We fit this offset by refining the 50 small disulfide-containing proteins after severing their disulfide bonds, and chose the smallest offset that favored the disulfide-linked conformations; this gave a value of -2 energy units.

Figure S.4.3.1: Disulfide-bond feature distributions comparing the Top8000 chains sample source (native) against 50 small disulfide-containing conformations refined with Rosetta using the Score12 disulfide model (old) and the updated disulfide model (new). Each cell plots the estimated distributions of disulfide bond geometric features: (UPPER-LEFT) SG-SG distance (UPPER RIGHT) C $\beta$ -SG-SG angle (LOWER LEFT) C $\alpha$ -C $\beta$ -SG-SG dihedral angle (LOWER RIGHT) C $\beta$ -SG-SG-C $\beta$  dihedral angle.

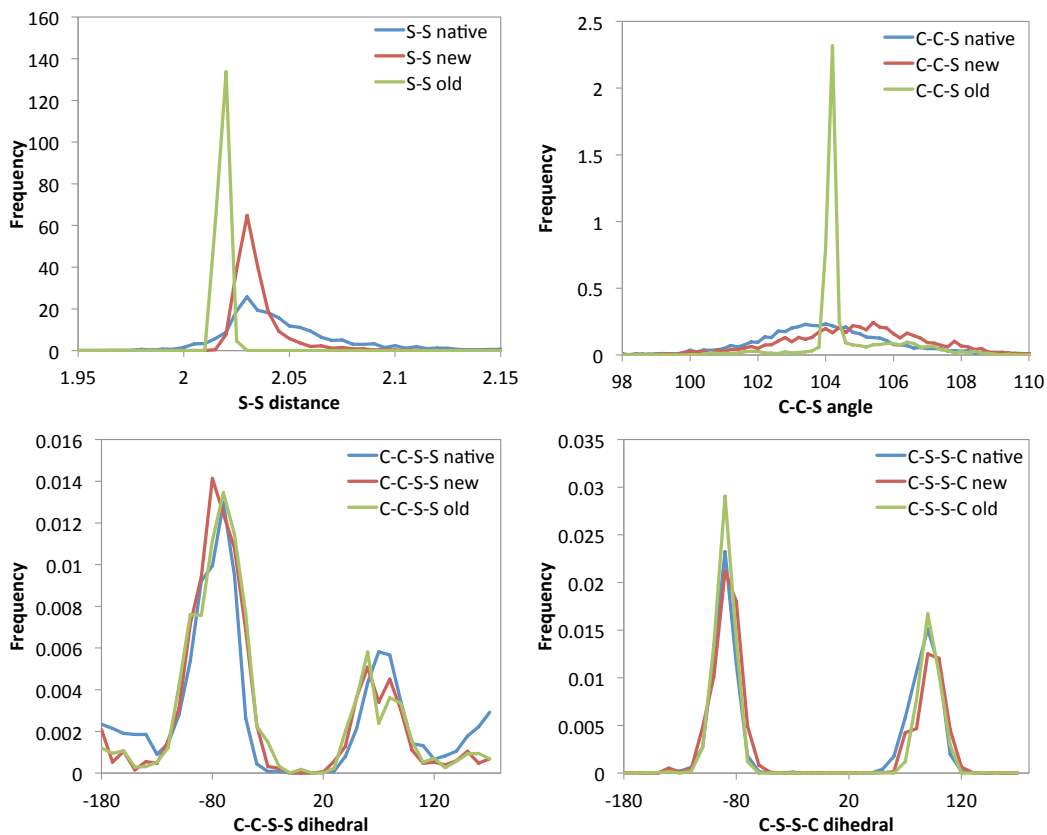

Figure S.4.3.2: Components of the new disulfide bond potential

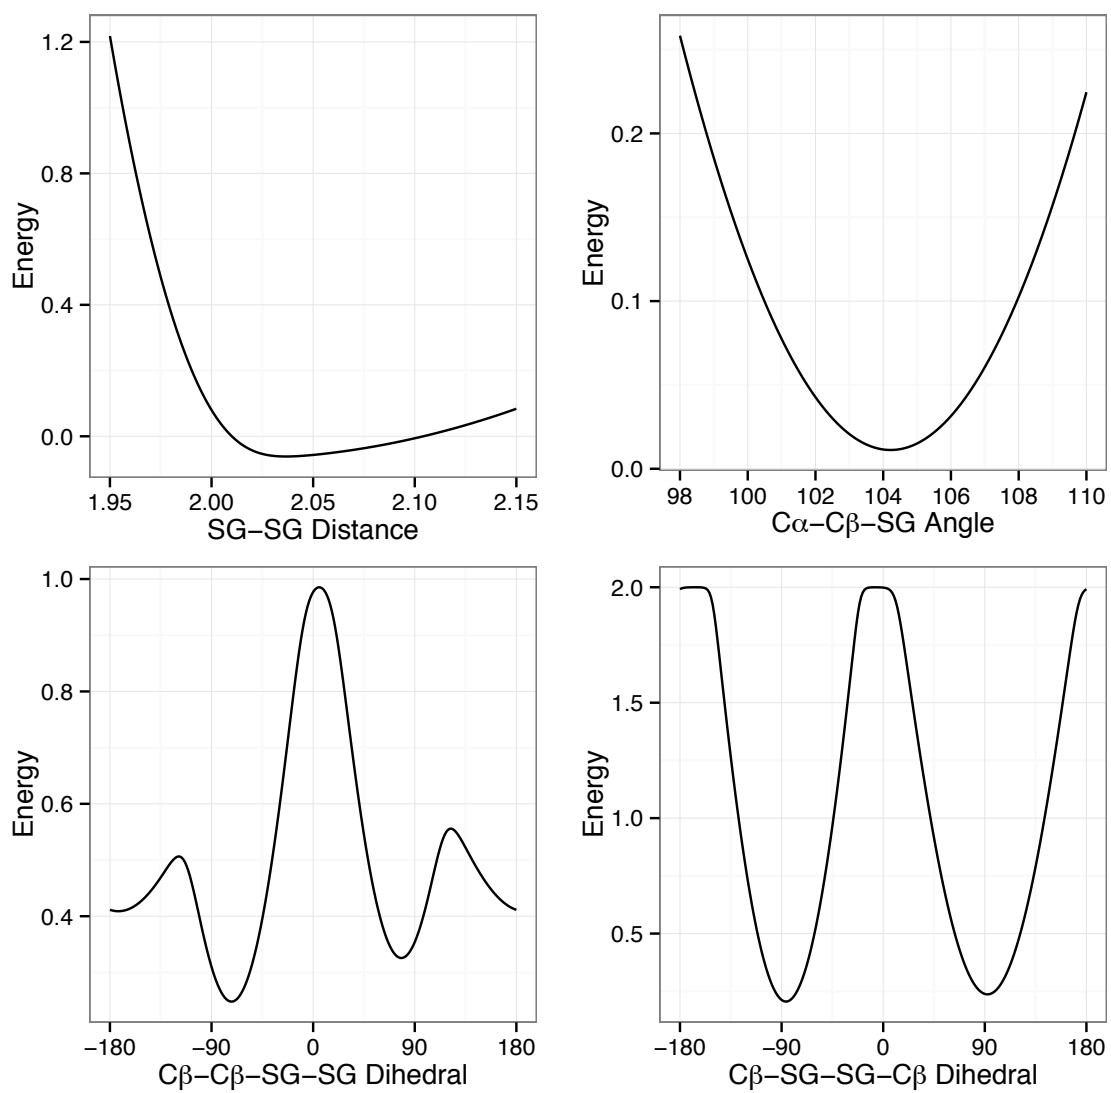

## S.5 Sample Sources and Energy Functions

### S.5.1) Overview of Score Functions

#### Score12

Score12 was the standard Rosetta score function 2003-2013 (Rohl, Strauss, Misura, & Baker, 2004).

The H-bond model is based on the model presented in Kortemme (2003) (Kortemme, Morozov, & Baker, 2003), which we call *HBv1* here. It consists of a linear combination of 1d potentials over H-bond lengths and angles derived from distributions estimated from a survey of 698 high-resolution crystal structures using a knowledge-based potential methodology. The functional form is  $E_{HBv1} = w_{env} \min(0, f_{AH_{dis}}^1 + g_{AHD}^1 + h_{BAH}^1)$  (Eq. 1). The full functional form is described in (S.3.22).

#### Baseline Corrections on Score12 (HBv1)

- 1) Idealized coordinates derived from the expected value for bond lengths, angles, and dihedral angles collected from structures (Song, Tyka, Leaver-Fay, Thompson, & Baker, 2010)
- 2) An updated disulfide potential (S.4.3)
- 3) The 2010 Dunbrack rotamer library (Leaver-fay et al., 2013; Shapovalov & Dunbrack, 2011)
- 4) Use of bicubic interpolation of backbone dependent knowledge based potentials (Leaver-fay et al., 2013)
- 5) Reversion of atomic LK\_DGFFREE(dgfree) parameters to the EEF1 parameters (Lazaridis & Karplus, 1999):
  - NH2O(HN2); -10 to -7.8
  - Narg(NC2); -11 to -10
  - OH(OH1); -6.77 to -6.70
  - ONH2(O); -10 to -5.85
- 6) Analytic evaluation (rather than table lookup) of the Lennard Jones (*fa\_rep/fa\_atr*) and EEF1 (*fa\_sol*) energy terms, which allows for correct derivative computation (Leaver-fay et al., 2013).

#### HBv2

*HBv2* includes

- 1) Baseline corrections
- 2) Rotameric sampling for hydroxyl-chi dihedral angles for (SER/THR): from (-60, 60, 180) to (0, 20, 40, ..., 340),
- 3) Adjust of Lennard-Jones parameters between hydroxyl O and H atoms and H-Bond acceptor atoms (Leaver-fay et al., 2013),
- 4) *sp2* H-Bond functional form is  $E_{HBv2} = w_{env} s (f_{AH_{dis}}^2 + g_{AHD}^2 + h_{BAH,BA_x}^2)$  (Eq. 2), it and the fit parameters are discussed in main document.

#### Elec

The *Elec* H-bond model is a simple Coulombic model of electrostatics; partial charges are assigned to atoms following CHARMM 19 (Brooks et al., 1983), the dielectric is proportional to  $1/r$  (Hingerty, Ritchie, Ferrell, & Turner, 1985; Warshel, Russell, & Churg,

1984) over the range, and both short- and long-range cutoffs are smoothed using spline interpolation.

*Elec* includes

- 1) Baseline corrections
- 2) Smoothed distance dependent dielectric Coulomb potential (S.4.2).
- 3) No HBond term

### **ElecHBv1**

*ElecHBv1* includes

- 1) Baseline corrections
- 2) Elec corrections
- 3) HBv1 term

### **ElecHBv2**

*ElecHBv2* includes

- 1) Baseline corrections
- 2) Elec electrostatics model
- 3) HBv2 H-bond model
- 4) The HBv2 parameters were refit so relaxed natives recapitulate the native distribution, described in the section (2.11).

## S.5.2) Flags and Score Weight files for Energy functions

Reference weights for each weight set have been refit using the OptE protocol (Leaver-fay et al., 2013), valid for Rosetta (Jul 2014).

### **Score12**

Flags:

```
-restore_pre_talaris_2013_behavior
```

Weights:

```
METHOD_WEIGHTS ref 0.102507 -0.0316374 -0.504387 -0.629043  
1.47152 -0.406181 1.01085 0.401181 -0.473385 0.187405 -0.203416 -  
0.776415 -1.00694 -0.795115 -0.772679 -0.336971 -0.244449  
0.311957 1.571 1.1242  
fa_atr 0.8  
fa_rep 0.44  
fa_sol 0.65  
pro_close 1  
fa_pair 0.49  
hbond_sr_bb 0.585  
hbond_lr_bb 1.17  
hbond_bb_sc 1.17  
hbond_sc 1.1  
dslf_ss_dst 1  
dslf_cs_ang 1  
dslf_ss_dih 1
```



```
dslf_ca_dih 1
rama 0.2
omega 0.5
fa_dun 0.56
p_aa_pp 0.32
ref 1
```

### **Elec**

#### **Flags:**

```
-restore_pre_talaris_2013_behavior
-corrections::chemical:icoor_05_2009
-analytic_etable_evaluation
-use_bicubic_interpolation
-dun10
-set_atom_properties fa_standard:ONH2:LK_DGFFREE:-5.85
fa_standard:NH2O:LK_DGFFREE:-7.8 fa_standard:Narg:LK_DGFFREE:-10.0
fa_standard:OH:LK_DGFFREE:-6.70
-smooth_hack_elec
-hackelec_min_dis 2.0
-hackelec_r_option false
```

#### **Weights:**

```
METHOD_WEIGHTS ref 0.102507 -0.0316374 -0.504387 -0.629043
1.47152 -0.406181 1.01085 0.401181 -0.473385 0.187405 -0.203416 -
0.776415 -1.00694 -0.795115 -0.772679 -0.336971 -0.244449
0.311957 1.571 1.1242
fa_atr 0.8
fa_rep 0.44
fa_sol 0.75
pro_close 1
hack_elec 0.70
hbond_sr_bb 0
hbond_lr_bb 0
hbond_bb_sc 0
hbond_sc 1.1
dslf_fa13 1.0
rama 0.2
omega 0.5
fa_dun 0.56
p_aa_pp 0.32
ref 1
```

### **HBv1**

#### **Flags:**

```
-restore_pre_talaris_2013_behavior
-corrections::chemical:icoor_05_2009
-analytic_etable_evaluation
-use_bicubic_interpolation
-dun10
```

```
-set_atom_properties fa_standard:ONH2:LK_DGFFREE:-5.85
fa_standard:NH2O:LK_DGFFREE:-7.8 fa_standard:Narg:LK_DGFFREE:-10.0
fa_standard:OH:LK_DGFFREE:-6.70
```

### Weights:

```
METHOD_WEIGHTS ref 0.16 1.7 -0.67 -0.81 0.63 -0.17 0.56 0.24 -
0.65 -0.1 -0.34 -0.89 0.02 -0.97 -0.98 -0.37 -0.27 0.29 0.91 0.51
fa_atr 0.8
fa_rep 0.44
fa_sol 0.75
fa_intra_rep 0.004
fa_pair 0.49
fa_plane 0
fa_dun 0.56
ref 1
hbond_lr_bb 1.17
hbond_sr_bb 0.585
hbond_bb_sc 1.17
hbond_sc 1.1
p_aa_pp 0.32
dslf_fa13 1.0
pro_close 1.0
omega 0.5
rama 0.2
```

### HBv2

#### Flags:

```
-restore_pre_talaris_2013_behavior
-corrections::chemical:icoor_05_2009
-analytic_etable_evaluation
-use_bicubic_interpolation
-dun10
-set_atom_properties fa_standard:ONH2:LK_DGFFREE:-5.85
fa_standard:NH2O:LK_DGFFREE:-7.8 fa_standard:Narg:LK_DGFFREE:-10.0
fa_standard:OH:LK_DGFFREE:-6.70
-hbond_params sp2_params
-hb_sp2_chipen
-hb_sp2_BAH180_rise 0.75
-hbond_measure_sp3acc_BAH_from_hvy
-lj_hbond_hdis 1.75
-lj_hbond_OH_donor_dis 2.6
-expand_st_chi2sampling
```

### Weights:

```
METHOD_WEIGHTS ref 0.242542 0.0525932 -0.49322 -0.640135 1.13617
-0.345874 0.871098 0.441403 -0.429774 0.203928 -0.127723 -0.74838
-0.593685 -0.768373 -0.84356 -0.269817 -0.17786 0.370444 1.29093
0.829296
fa_atr 0.8
fa_rep 0.44
```

fa\_sol 0.75  
fa\_intra\_rep 0.004  
pro\_close 1  
fa\_pair 0.49  
hbond\_sr\_bb 1.17  
hbond\_lr\_bb 1.17  
hbond\_bb\_sc 1.17  
hbond\_sc 1.1  
dslf\_fa13 1.0  
rama 0.2  
omega 0.5  
fa\_dun 0.56  
p\_aa\_pp 0.32  
yhh\_planarity 0.5  
ref 1

## ElecHBv2

### Flags:

# This is Talaris2013 is the default

### Weights:

METHOD\_WEIGHTS ref 0.592942 0.354993 -1.28682 -1.55374 0.43057  
0.140526 0.357498 0.831803 -0.287374 0.602328 0.158677 -0.94198 -  
0.219285 -1.17797 -0.14916 0.176583 0.16454 0.744844 0.92933  
0.131696  
fa\_atr 0.8  
fa\_rep 0.44  
fa\_sol 0.75  
fa\_intra\_rep 0.004  
hack\_elec 0.7  
pro\_close 1  
hbond\_sr\_bb 1.17  
hbond\_lr\_bb 1.17  
hbond\_bb\_sc 1.17  
hbond\_sc 1.1  
dslf\_fa13 1.0  
rama 0.2  
omega 0.5  
fa\_dun 0.56  
p\_aa\_pp 0.32  
yhh\_planarity 0.5  
ref 1

### References:

Brooks, B. R., Bruccoleri, R. E., Olafson, B. D., States, D. J., Swaminathan, S., & Karplus, M. (1983). CHARMM: A program for macromolecular energy, minimization, and dynamics calculations. *Journal of Computational Chemistry*, 4(2), 187–217. doi:10.1002/jcc.540040211

- Hingerty, B. E., Ritchie, R. H., Ferrell, T. L., & Turner, J. E. (1985). Dielectric effects in biopolymers: The theory of ionic saturation revisited. *Biopolymers*, 24(3), 427–439. doi:10.1002/bip.360240302
- Kortemme, T., Morozov, A. V., & Baker, D. (2003). An Orientation-dependent Hydrogen Bonding Potential Improves Prediction of Specificity and Structure for Proteins and Protein–Protein Complexes. *Journal of Molecular Biology*, 326(4), 1239–1259. doi:10.1016/S0022-2836(03)00021-4
- Lazaridis, T., & Karplus, M. (1999). Effective energy function for proteins in solution. *Proteins Structure Function and Genetics*, 35(2), 139–45.
- Leaver-fay, A., O'Meara, M. J., Tyka, M., Jacak, R., Song, Y., Kellogg, E. H., ... Kuhlman, B. (2013). *Scientific Benchmarks for Guiding Macromolecular Energy Function Improvement* (Vol. 523). doi:10.1016/B978-0-12-394292-0.00006-0
- Rohl, C., Strauss, C., Misura, K., & Baker, D. (2004). Protein structure prediction using Rosetta. *Methods in Enzymology*, 383, 66–93.
- Shapovalov, M. V., & Dunbrack, R. L. (2011). A smoothed backbone-dependent rotamer library for proteins derived from adaptive kernel density estimates and regressions. *Structure (London, England : 1993)*, 19(6), 844–58. doi:10.1016/j.str.2011.03.019
- Song, Y., Tyka, M., Leaver-Fay, A., Thompson, J., & Baker, D. (2010). Structure guided forcefield optimization. *Proteins: Structure, Function, and Bioinformatics*.
- Warshel, a, Russell, S. T., & Churg, a K. (1984). Macroscopic models for studies of electrostatic interactions in proteins: limitations and applicability. *Proceedings of the National Academy of Sciences of the United States of America*, 81(15), 4785–9.

## S.6 Benchmark Details

### S.6.1 Relax Native Runtime

To test the impact of the score functions studied in this work on the run-time we created a relax-native benchmark. Structures were selected from the Protein Databank April 19'th 2014 with the following criteria: deposited since 2012, resolution < 1.5 Å, no ligands, no modified residues, has electron density link in the EDS, zero disulfide bonds, and filtered to have at most 40% sequence identity. This returned a list of 35 native structures.

|      |      |      |      |
|------|------|------|------|
| 3VQF | 4CIL | 4GAI | 4JMI |
| 3VZ6 | 4DMV | 4GEI | 4JZ5 |
| 3W24 | 4DQ7 | 4GMQ | 4JZQ |
| 3ZBD | 4DT4 | 4GS3 | 4KEE |
| 3ZNY | 4EEW | 4HJP | 4LJ1 |
| 4B6G | 4EF0 | 4HS5 | 4LTT |
| 4B89 | 4EZA | 4I84 | 4M9K |
| 4B9G | 4G3N | 4IC4 | 4NI6 |
| 4B9I | 4G8D | 4J5Q |      |

Each native was relaxed 5 times with the FastRelax protocol, with a separate execution of Rosetta per target. The mean and standard deviation of the total runtime for each target was computed and is shown in the following table:

| <b>Score<br/>Function</b> | <b>Mean<br/>seconds</b> | <b>StdDev<br/>seconds</b> |
|---------------------------|-------------------------|---------------------------|
| Score12'                  | 2,801.6                 | 4,974.8                   |
| HBv1                      | 2,776.7                 | 5,016.0                   |
| HBv2                      | 1,867.1                 | 2,786.3                   |
| Elec                      | 3,302.6                 | 5,876.7                   |
| ElecHBv2                  | 2,499.5                 | 3,394.9                   |

The FastRelax protocol includes stages of full atom gradient-based minimization (Minimize) and fixed-backbone stochastic discrete-sampling of sidechain conformations (Repack). Factors that contribute to changes in run time include the computational cost of each energy function evaluation and the “smoothness” of the energy function affecting the rate of convergence during each minimization. These results indicate the *ElecHBv2* is not slower than *Score12'*.

## S.6.2 Scientific Benchmark Methods

### S.6.2.1 Relax Native Recovery

We use the FastRelax protocol to sample near native conformations that are optimized for the Rosetta energy function. The FastRelax protocol iterates between repacking sidechains and performing quasi-Newton minimization of torsional degrees of freedom while ramping in five steps the strength of the repulsive component of the Lennard-Jones term from  $1/10^{\text{th}}$  up to full strength, cycling from low- to high-strength repulsion three times(Khatib et al., 2011).

We chose this sampling protocol over less aggressive protocols (such as only performing minimization) to allow the structures to escape local minima in the energy landscape, and over more aggressive protocols (such as trying to fold proteins from extended chains using Rosetta's AbRelax protocol(Bradley, Misura, & Baker, 2005)) in the interest of focusing our efforts on matching distributions where native-like contacts are possible: an *ab initio* folding protocol might emphasize easy-to-form local contacts over harder-to-form long-range contacts and misrepresent the deficiencies in an energy function.

Having a structure that is locally optimal for the energy function is often important starting point for structure design tasks(Nivón, Moretti, & Baker, 2013). While it is possible to resort to explicit structural restraints to remain close to the native structure, ideally the energy function should move the native conformation as little as possible. Additionally having the Rosetta energy function consistent with native conformations is useful for and solving crystal structures(DiMaio et al., 2013).

### S.6.2.2 Monomer Sequence Recovery

This protocol first builds rotamers, taken from 2010 Dunbrack rotamer library supplemented with extra samples for the first two  $\chi$  dihedrals taken at plus and minus one standard deviation from the mean for the rotameric  $\chi$  (those dihedrals where the two center atoms that define it are both  $\text{sp}^3$  hybridized), and halfway between the mean  $\chi$  angle for each rotamer bin and either bin boundary for the non-rotameric  $\chi$  angles (those dihedrals where one of the two center atoms that define it is  $\text{sp}^2$  hybridized, e.g.  $\chi_2$  from phenylalanine). Following rotamer creation, the protocol employs the multi-cool simulated annealer(Leaver-Fay, Jacak, Stranges, & Kuhlman, 2011) to optimize the rotamer and amino acid assignment. This annealer, like Rosetta's default annealer(Kuhlman & Baker, 2000), considers random rotamer substitutions, evaluates the change in energy induced by the rotamer substitution, and then uses the current "temperature" and the Metropolis criterion to either accept or reject the substitution. The multi-cool annealer has an altered temperature schedule from Rosetta's default annealer and spends more time at very low temperatures

### S.6.2.3 Interface Sequence Recovery

The complexes were chosen from X-ray crystal structures deposited in the Protein Databank having resolution less than  $2 \text{ \AA}$ , bond length outliers in less than 5% of the residues (as defined by MolProbity(Chen et al., 2010)), a MolProbity score less than 2.0,

```
run.sh
#!/usr/bin/env bash
```

```

set -e

rosetta_path=$HOME/GIT/Rosetta/main

basename=$PWD
jobname=$(basename $PWD)
outdir="outputs"

nprocs=173
exepath="${rosetta_path}/source/bin/rosetta_scripts.mpi.linuxgccr
release"

queue="day"
bsubcmd="bsub -q $queue -n $nprocs -J $jobname -o stdout.%J -e
stderr.%J -a mvapich mpirun"

cmd="$bsubcmd $exepath @score.flags @protocol.flags \
  -mpi_tracer_to_file $jobname.tracers"

[ -e "$PWD/${outdir}/" ] && rm -r "$PWD/${outdir}/"
mkdir $outdir
cd $outdir
cp ../$0 launcher_used
cp ../*flags .
cp ../*xml .
cp ../*list .
echo $cmd > cmd_run
$cmd

protocol.flags
-database Rosetta/main/database
-l kan_plus.list
-nstruct 1
-jd2:ntrials 20
-ignore_unrecognized_res
-linmem_ig 10
-skip_set_reasonable_fold_tree
-out:pdb_gz true
-overwrite
-options:user
-parser:protocol interface_packmin.xml

interface_packmin.xml
<ROSETTASCRIPITS>
  <SCOREFXNS>
    <talaris_optE weights=KH_talaris_kanplus_20130602 />
  </SCOREFXNS>
  <TASKOPERATIONS>
    <InitializeFromCommandline name=init />
    <RestrictToInterfaceVector name=interface_vector
jump=1 />

```

```

</TASKOPERATIONS>

<MOVERS>
  <AtomTree name=docking_tree docking_ft=1 />

  <MinMover name=min_all
    scorefxn=talaris_optE
    chi=1
    bb=1
    jump=1 />

  <PackRotamersMover name=pack_inter
    scorefxn=talaris_optE
    task_operations=init,interface_vector />

  <ParsedProtocol name=bind>
    <Add mover=pack_inter />
    <Add mover=min_all />
  </ParsedProtocol>

  <InterfaceAnalyzerMover name=interface_analyzer
    scorefxn=talaris_optE
    packstat=1
    pack_input=0
    pack_separated=0
    jump=1 />
</MOVERS>

<APPLY_TO_POSE>
</APPLY_TO_POSE>
<PROTOCOLS>
  <Add mover_name=docking_tree />
  <Add mover_name=bind />
  <Add mover_name=interface_analyzer />
</PROTOCOLS>
</ROSETTASCRIPTS>

```

Bradley, P., Misura, K. M. S., & Baker, D. (2005). Toward high-resolution de novo structure prediction for small proteins. *Science*, 309(5742), 1868–71. doi:10.1126/science.1113801

Chen, V. B., Arendall, W. B., Headd, J. J., Keedy, D. a, Immormino, R. M., Kapral, G. J., ... Richardson, D. C. (2010). MolProbity: all-atom structure validation for macromolecular crystallography. *Acta Crystallographica. Section D, Biological Crystallography*, 66(Pt 1), 12–21. doi:10.1107/S0907444909042073

DiMaio, F., Echols, N., Headd, J. J., Terwilliger, T. C., Adams, P. D., & Baker, D. (2013). Improved low-resolution crystallographic refinement with Phenix and Rosetta. *Nature Methods*, (September), 1–5. doi:10.1038/nmeth.2648



- Khatib, F., Cooper, S., Tyka, M. D., Xu, K., Makedon, I., Popovic, Z., ... Players, F. (2011). Algorithm discovery by protein folding game players. *Proceedings of the National Academy of Sciences of the United States of America*, 108(47), 18949–53. doi:10.1073/pnas.1115898108
- Kuhlman, B., & Baker, D. (2000). Native protein sequences are close to optimal for their structures. *Proceedings of the National Academy of Sciences of the United States of America*, 97(19), 10383–10388.
- Leaver-Fay, A., Jacak, R., Stranges, P. B., & Kuhlman, B. (2011). A generic program for multistate protein design. *PloS One*, 6(7), e20937. doi:10.1371/journal.pone.0020937
- Nivón, L., Moretti, R., & Baker, D. (2013). A Pareto-optimal refinement method for protein design scaffolds. *PloS One*, 8(4), 1–5. doi:10.1371/Citation
